# Supplementary material for: Multivariate Statistical and Correlation Analysis between Acoustic and Geotechnical Variables in Soil Compression Tests Monitored by the Acoustic Emission Technique
Source: MDPI journal article supplement (doi:10.3390/math11194085), 2023-09-26
Supplement: s1 [file s1]

# Supplementary Materials

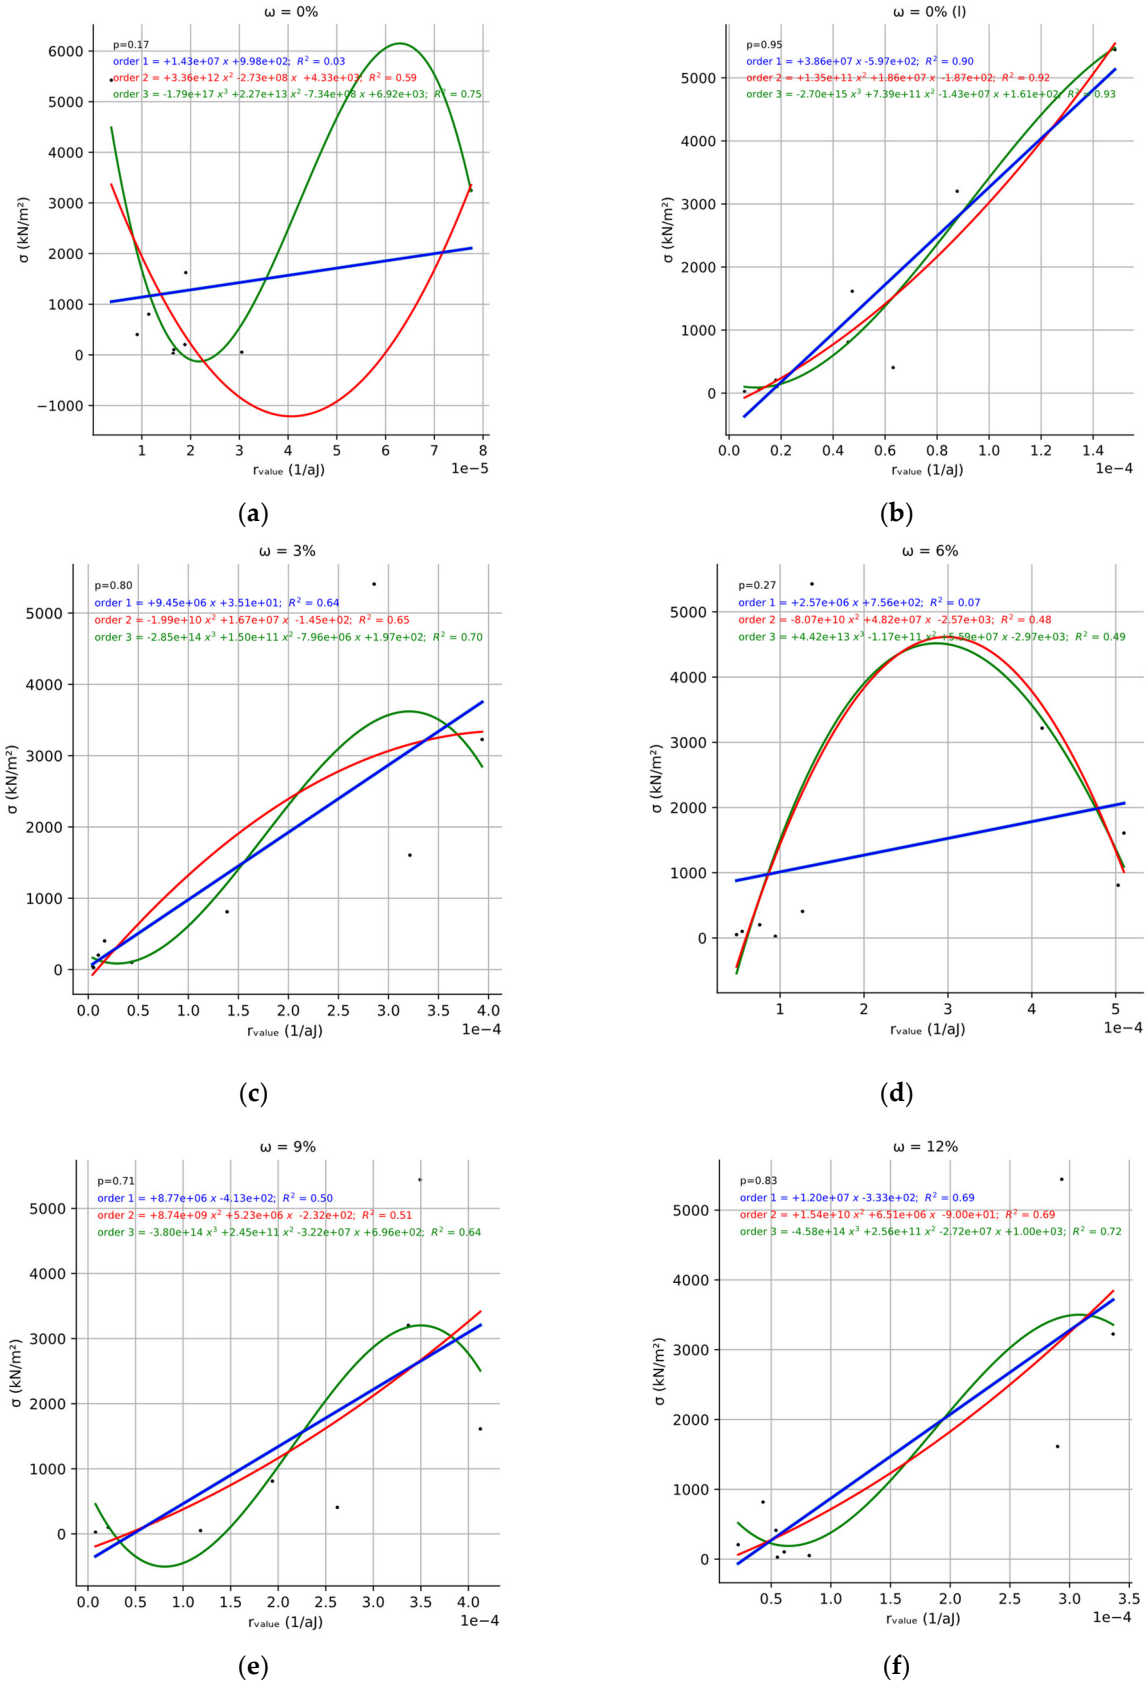

**Figure S1.** Regression lines for the correlation between loading stage effective stress ( $\sigma'_{ls}$ ) and loading stage  $r$  value  $r_{1s}$ . 6 soils tested. (a)  $\omega_c = 0\%$ ; (b)  $\omega_c = 0\%$  (L); (c)  $\omega_c = 3\%$ ; (d)  $\omega_c = 6\%$ ; (e)  $\omega_c = 9\%$ ; (f)  $\omega_c = 12\%$

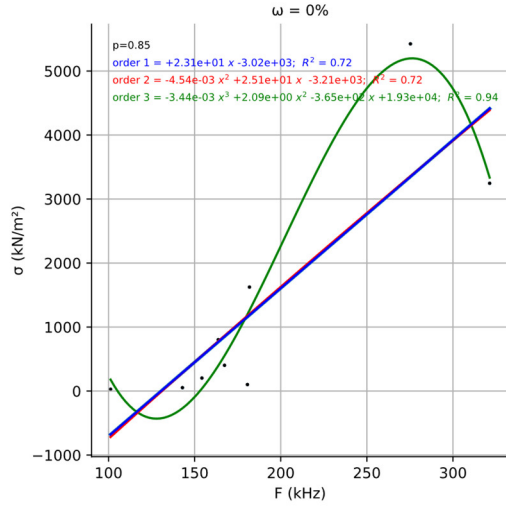

(a)

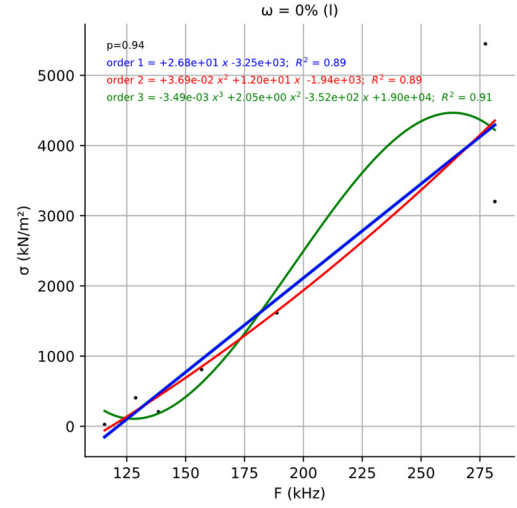

(b)

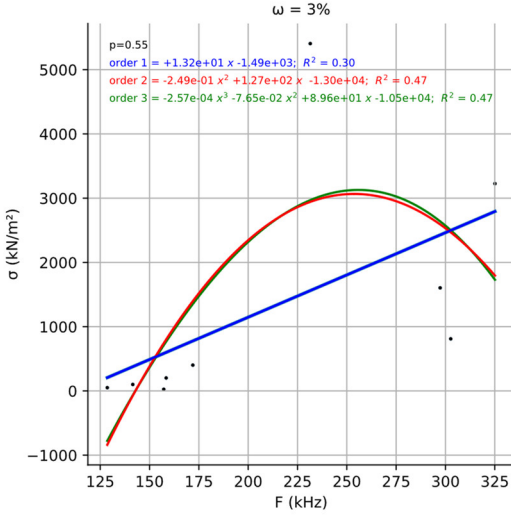

(c)

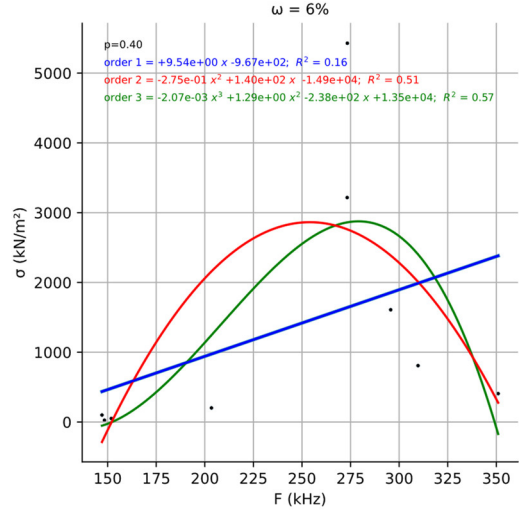

(d)

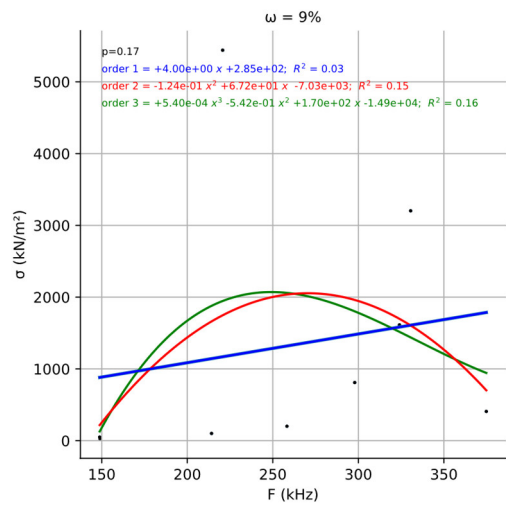

(e)

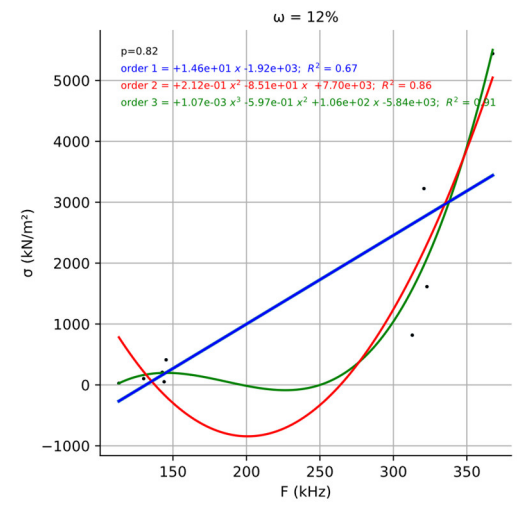

(f)

**Figure S2.** Regression lines for the correlation between loading stage effective stress ( $\sigma'_{ls}$ ) and loading stage frequency  $F_{ls}$ . 6 soils tested. (a)  $\omega_c = 0\%$ ; (b)  $\omega_c = 0\% (L)$ ; (c)  $\omega_c = 3\%$ ; (d)  $\omega_c = 6\%$ ; (e)  $\omega_c = 9\%$ ; (f)  $\omega_c = 12\%$

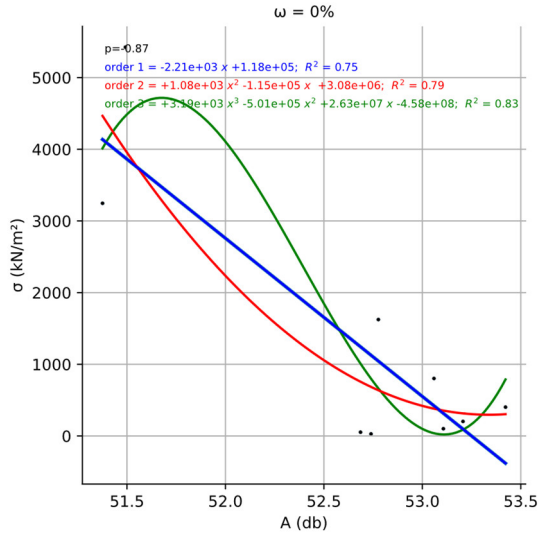

(a)

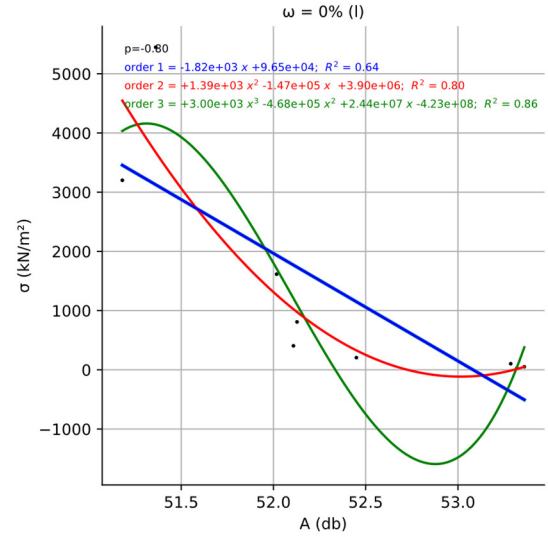

(b)

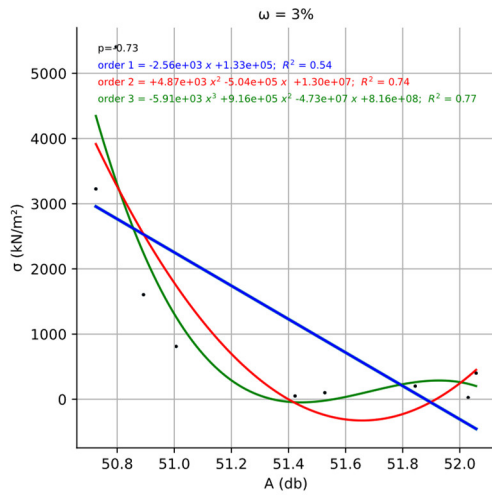

(c)

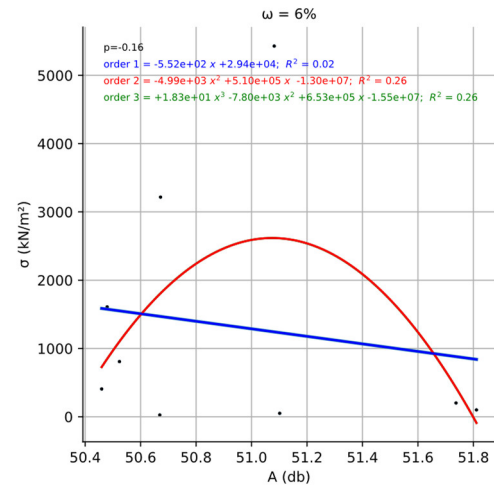

(d)

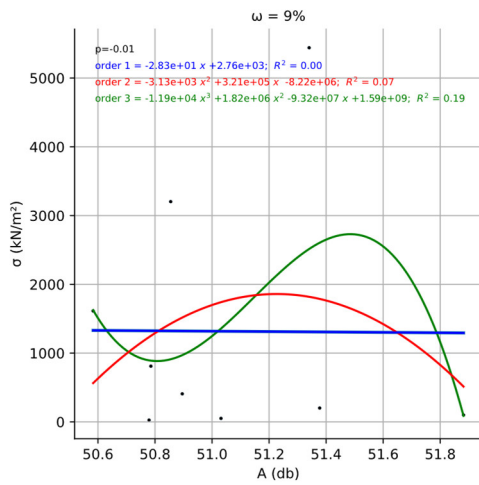

(e)

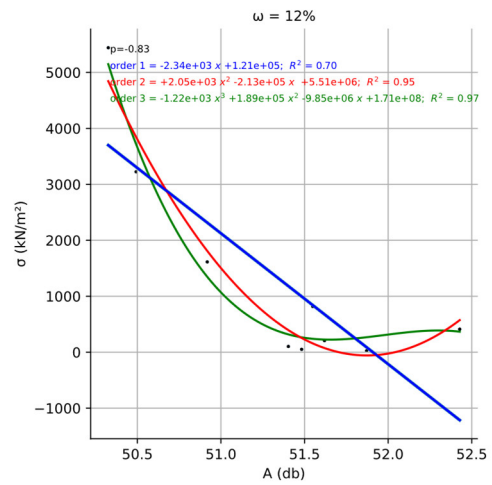

(f)

**Figure S3.** Regression lines for the correlation between loading stage effective stress ( $\sigma'_{ls}$ ) and loading stage amplitude  $A_{ls}$ . 6 soils tested. (a)  $\omega_c = 0\%$ ; (b)  $\omega_c = 0\% (I)$ ; (c)  $\omega_c = 3\%$ ; (d)  $\omega_c = 6\%$ ; (e)  $\omega_c = 9\%$ ; (f)  $\omega_c = 12\%$

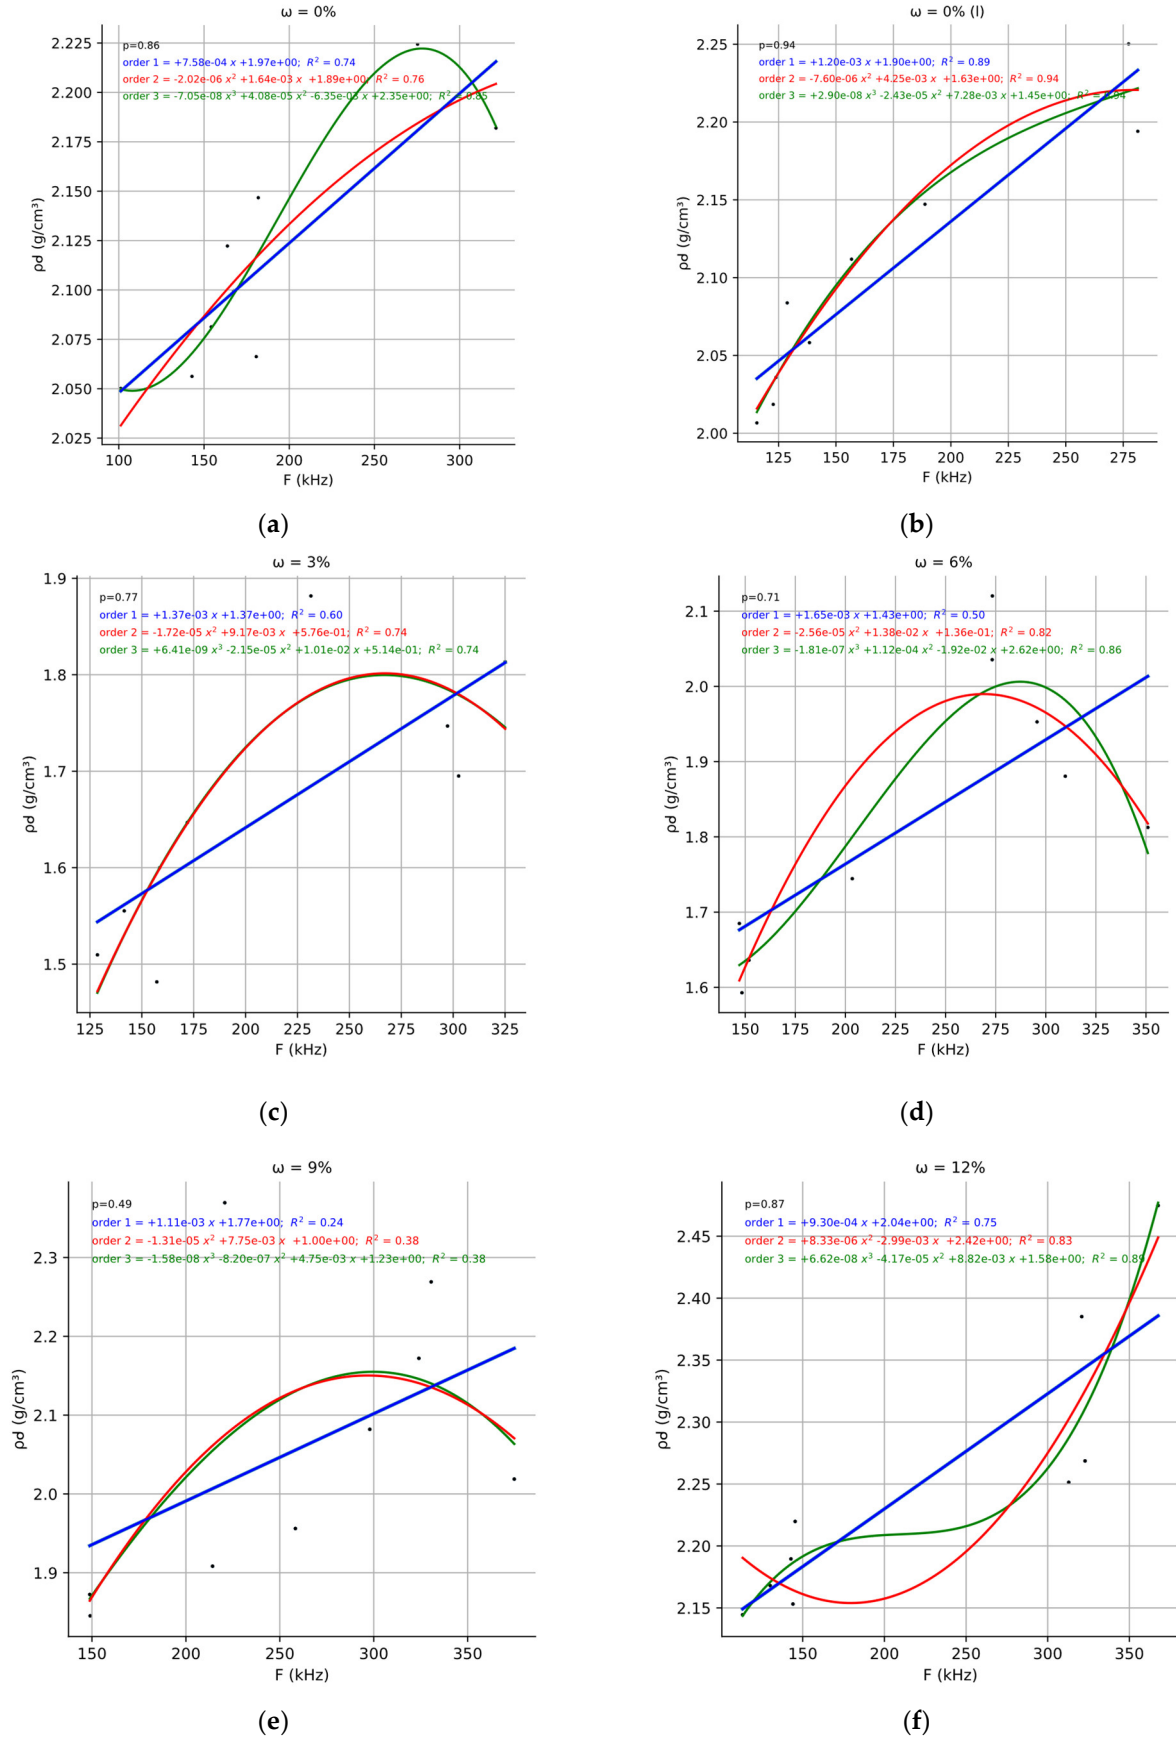

**Figure S4.** Regression lines for the correlation between loading stage density  $\rho_{d,ls}$  and loading stage frequency  $F_{ls}$ . 6 soils tested. (a)  $\omega_c = 0\%$ ; (b)  $\omega_c = 0\% (I)$ ; (c)  $\omega_c = 3\%$ ; (d)  $\omega_c = 6\%$ ; (e)  $\omega_c = 9\%$ ; (f)  $\omega_c = 12\%$



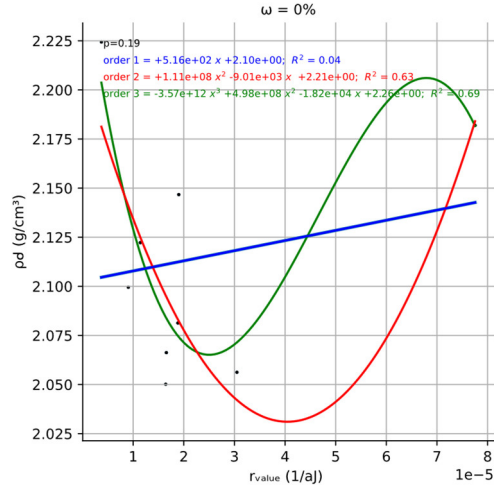

(a)

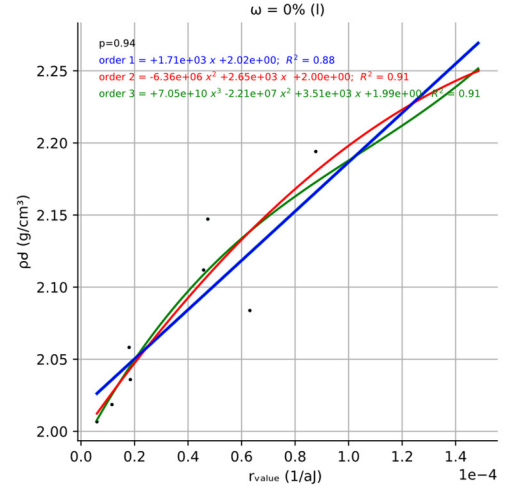

(b)

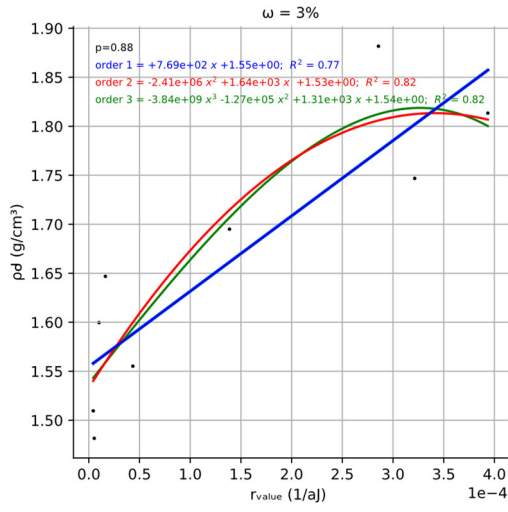

(c)

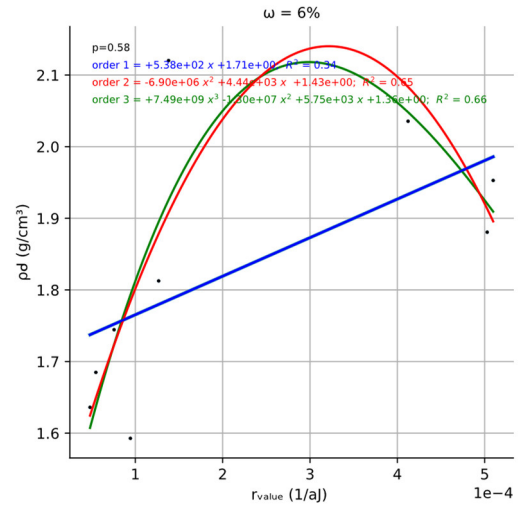

(d)

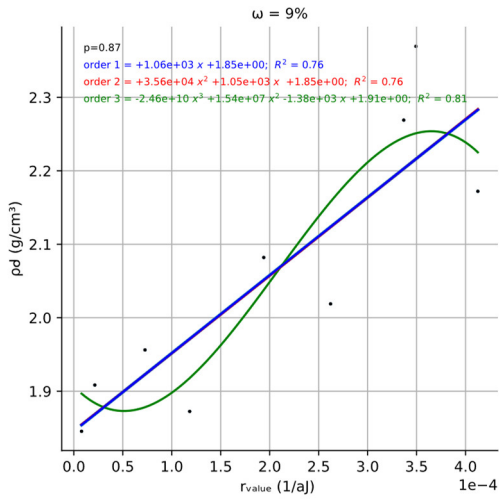

(e)

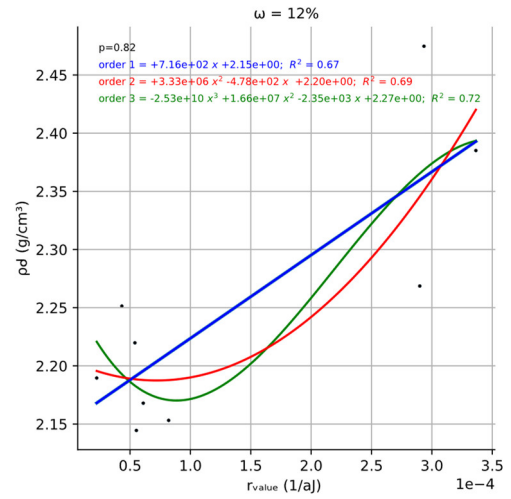

(f)

**Figure S5.** Regression lines for the correlation between loading stage density  $\rho_{d,ls}$  and loading stage r value  $r_{ls}$ . 6 soils tested. (a)  $\omega_c = 0\%$ ; (b)  $\omega_c = 0\%$  (L); (c)  $\omega_c = 3\%$ ; (d)  $\omega_c = 6\%$ ; (e)  $\omega_c = 9\%$ ; (f)  $\omega_c = 12\%$

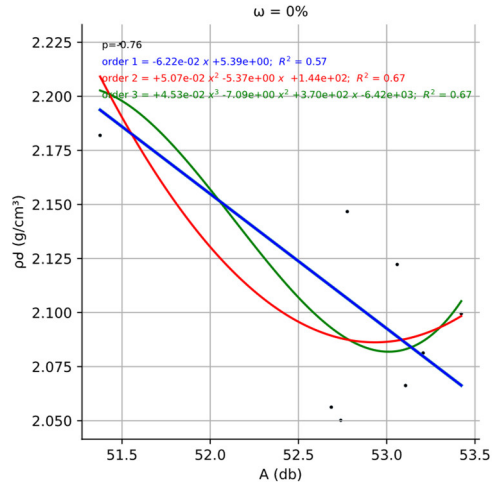

(a)

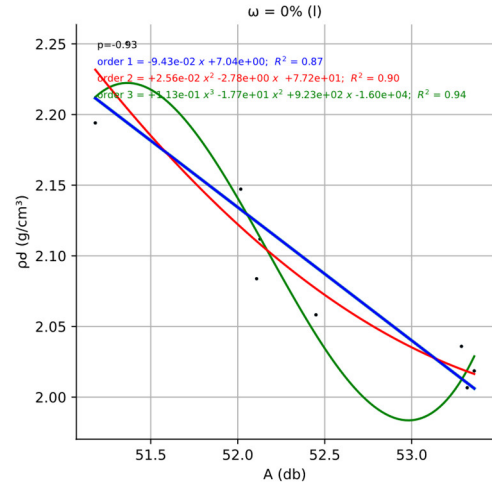

(b)

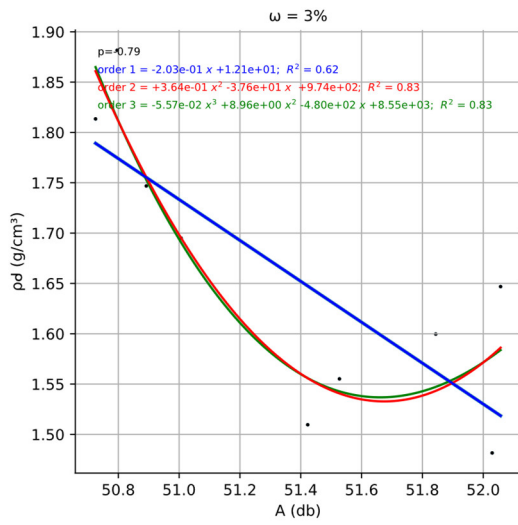

(c)

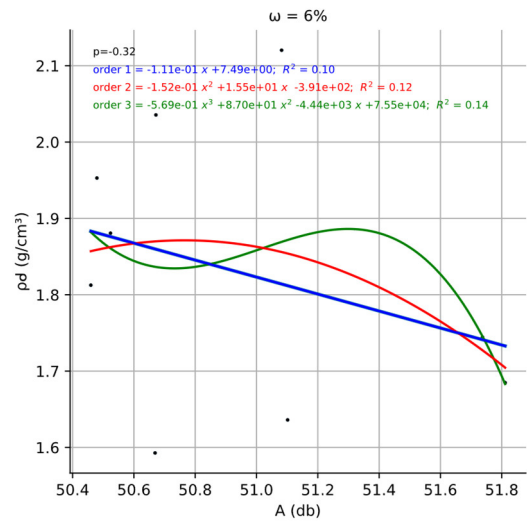

(d)

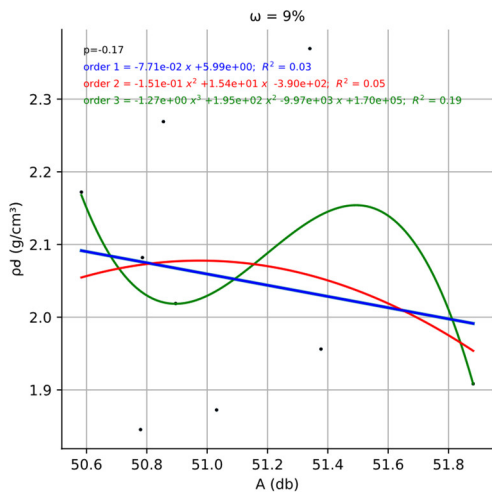

(e)

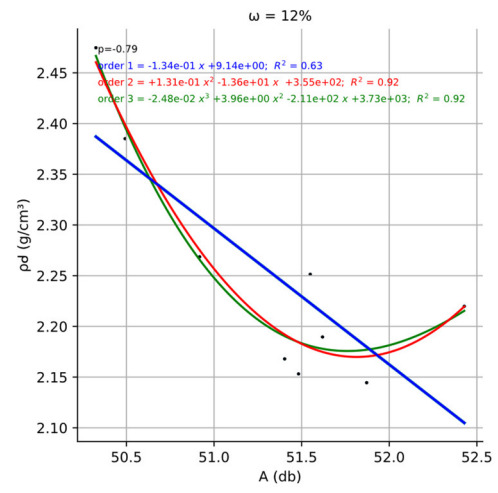

(f)

**Figure S6.** Regression lines for the correlation between loading stage density  $\rho_{d,ls}$  and loading stage amplitude  $A_{ls}$ . 6 soils tested. (a)  $\omega_c = 0\%$ ; (b)  $\omega_c = 0\% (L)$ ; (c)  $\omega_c = 3\%$ ; (d)  $\omega_c = 6\%$ ; (e)  $\omega_c = 9\%$ ; (f)  $\omega_c = 12\%$

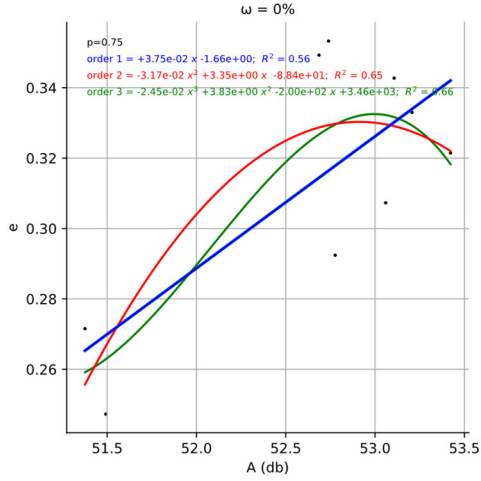

(a)

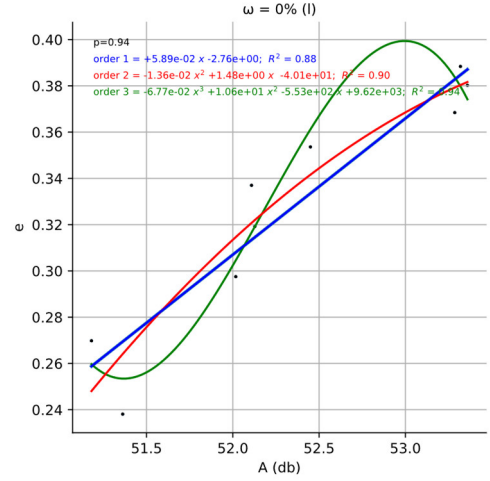

(b)

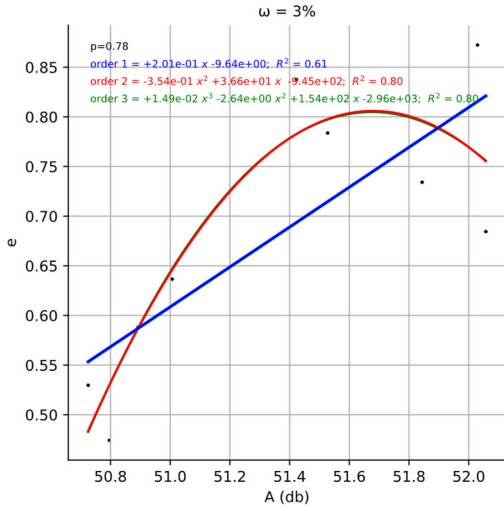

(c)

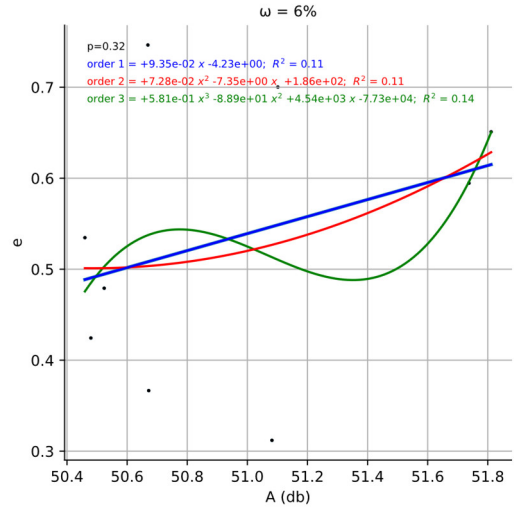

(d)

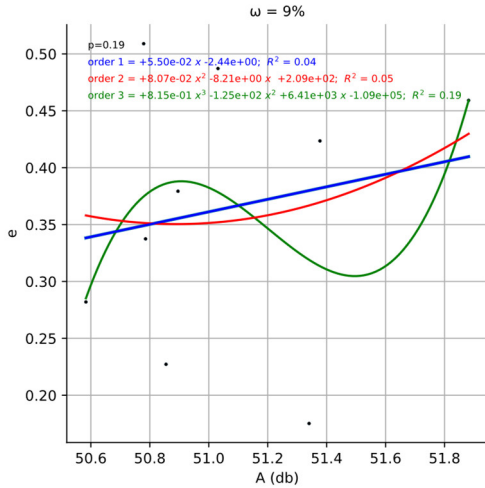

(e)

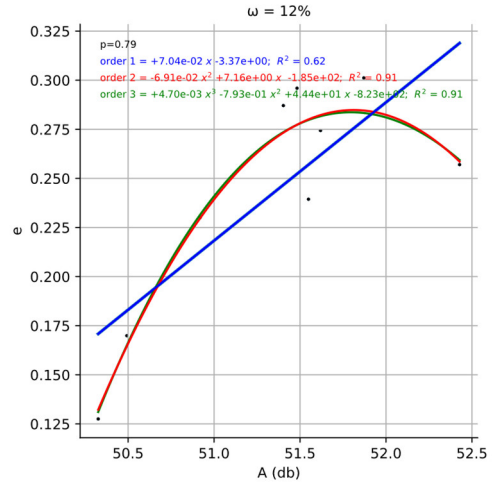

(f)

**Figure S7.** Regression lines for the correlation between loading stage void ratio  $e_{ls}$  and loading stage amplitude  $A_{ls}$ . 6 soils tested. (a)  $\omega_c = 0\%$ ; (b)  $\omega_c = 0\% (L)$ ; (c)  $\omega_c = 3\%$ ; (d)  $\omega_c = 6\%$ ; (e)  $\omega_c = 9\%$ ; (f)  $\omega_c = 12\%$

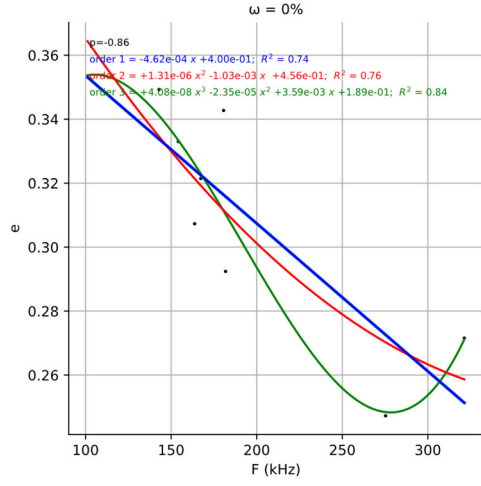

(a)

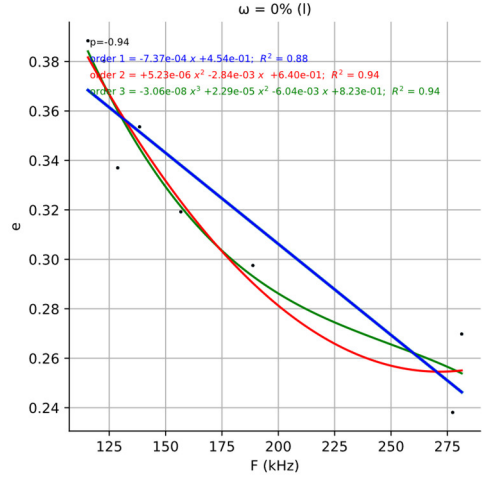

(b)

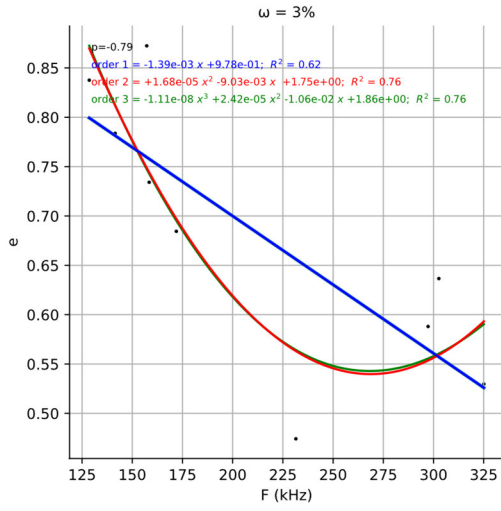

(c)

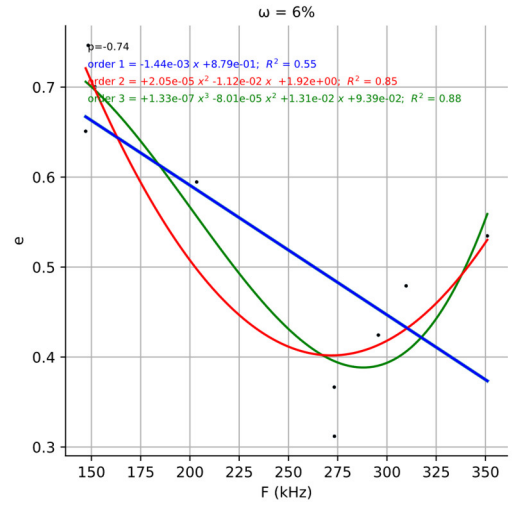

(d)

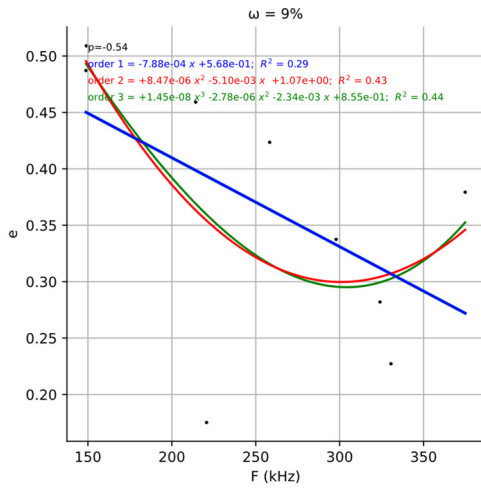

(e)

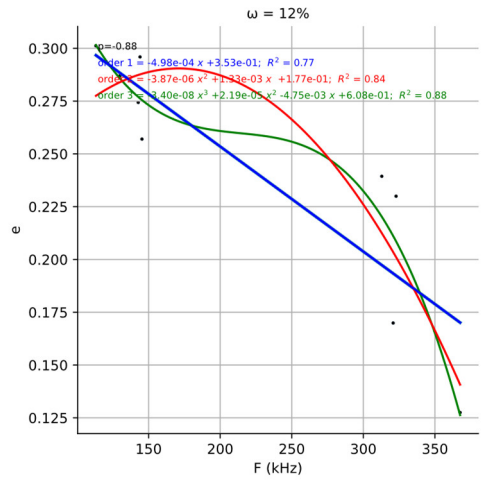

(f)

**Figure S8.** Regression lines for the correlation between loading stage void ratio  $e_{Ls}$  and loading stage frequency  $F_{Ls}$ . 6 soils tested. (a)  $\omega_c = 0\%$ ; (b)  $\omega_c = 0\% (L)$ ; (c)  $\omega_c = 3\%$ ; (d)  $\omega_c = 6\%$ ; (e)  $\omega_c = 9\%$ ; (f)  $\omega_c = 12\%$

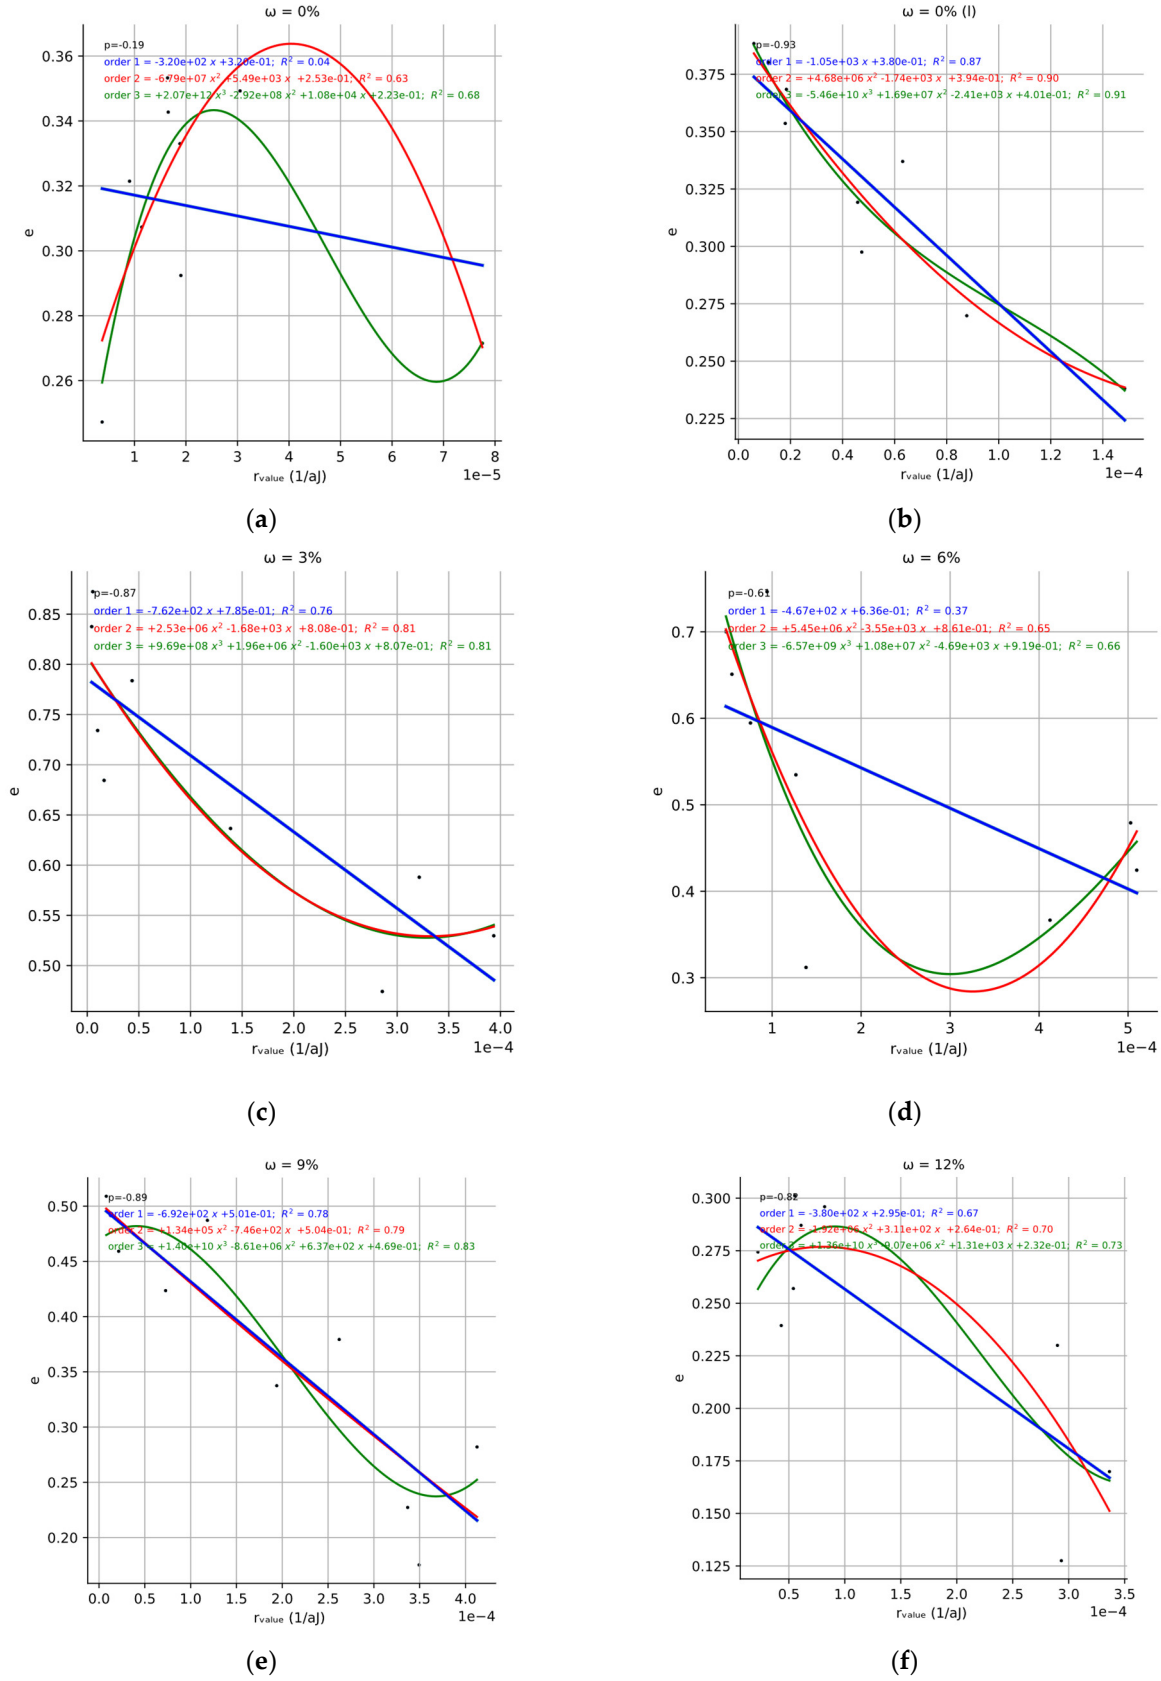

**Figure S9.** Regression lines for the correlation between loading stage void ratio  $e_{ls}$  and loading stage  $r$  value  $r_{ls}$ . 6 soils tested. (a)  $\omega_c = 0\%$ ; (b)  $\omega_c = 0\% (L)$ ; (c)  $\omega_c = 3\%$ ; (d)  $\omega_c = 6\%$ ; (e)  $\omega_c = 9\%$ ; (f)  $\omega_c = 12\%$

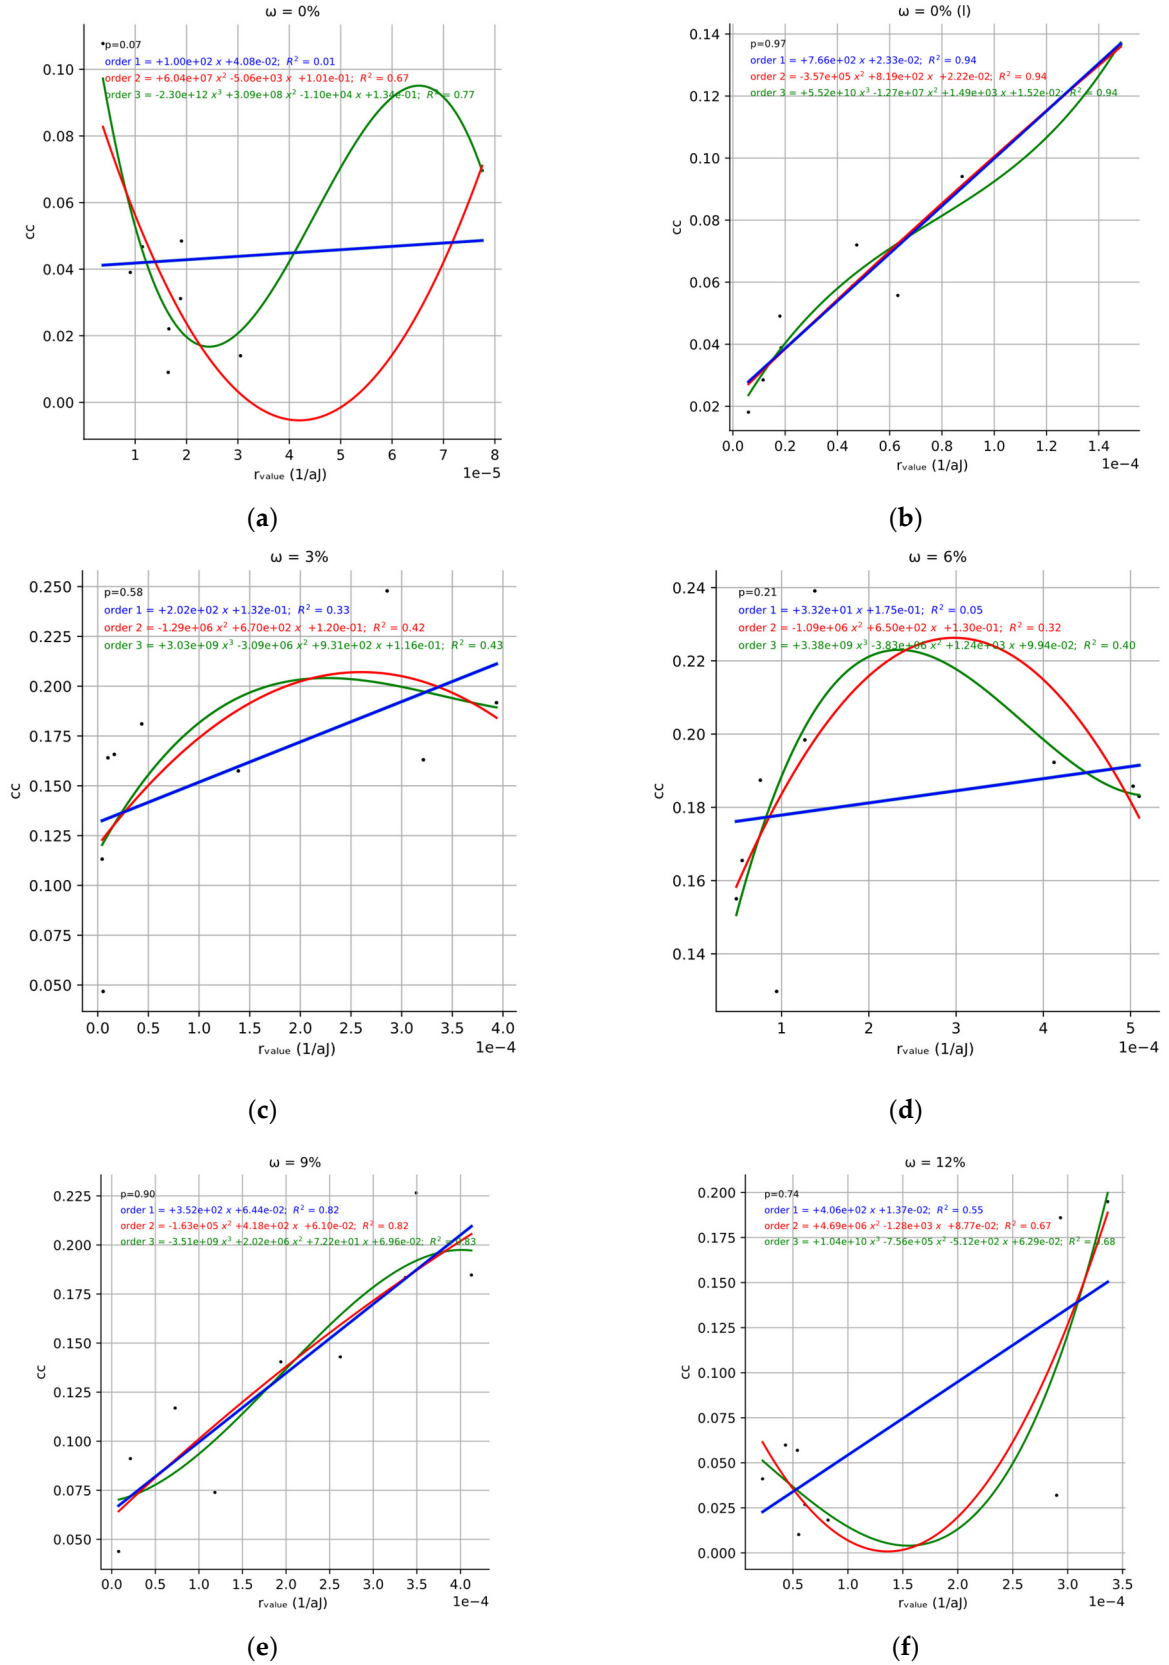

**Figure S10.** Regression lines for the correlation between loading stage compression index  $c_{c,ls}$  and loading stage  $r$  value  $r_{ls}$ . 6 soils tested. (a)  $\omega_c = 0\%$ ; (b)  $\omega_c = 0\%$  (L); (c)  $\omega_c = 3\%$ ; (d)  $\omega_c = 6\%$ ; (e)  $\omega_c = 9\%$ ; (f)  $\omega_c = 12\%$



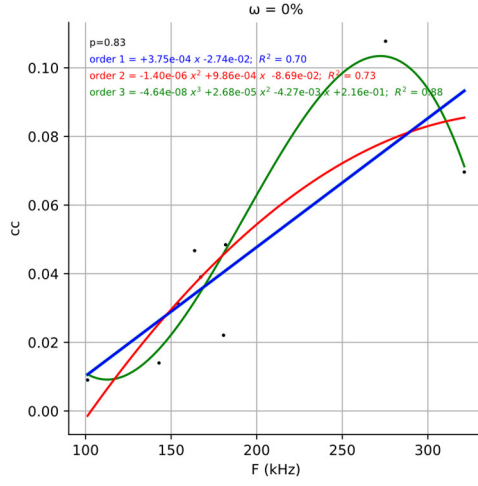

(a)

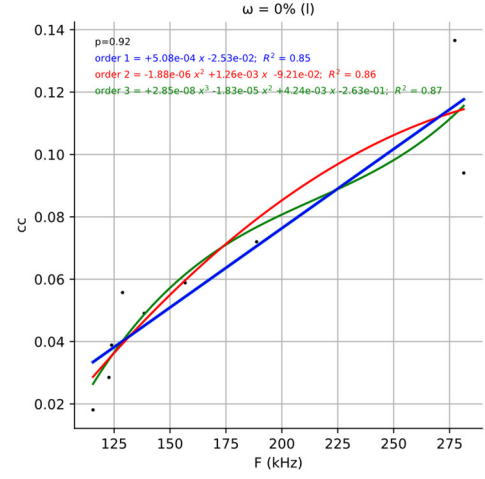

(b)

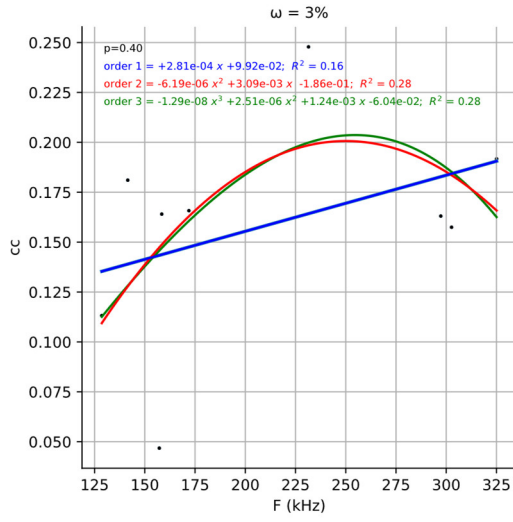

(c)

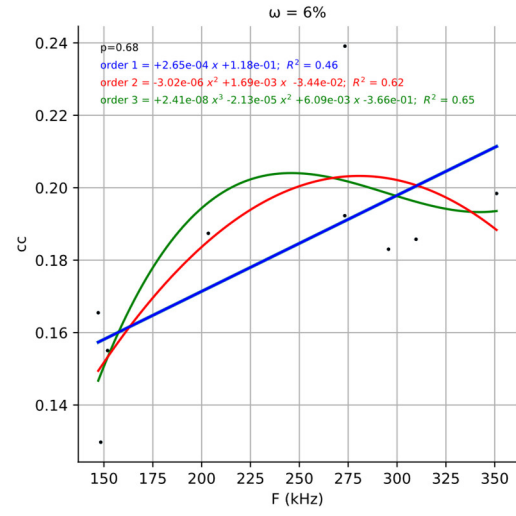

(d)

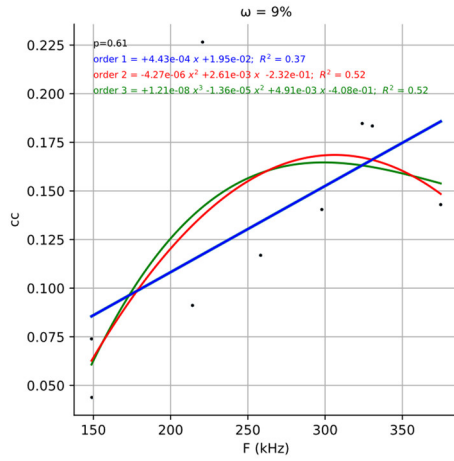

(e)

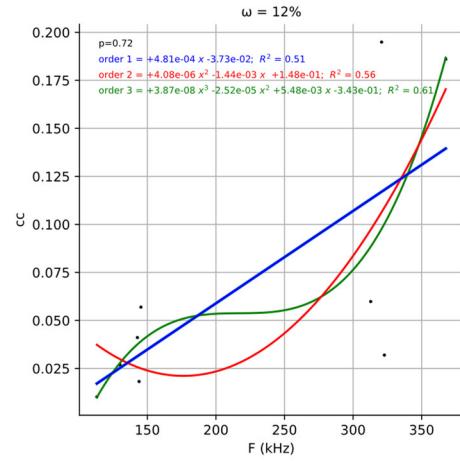

(f)

**Figure S11.** Regression lines for the correlation between loading stage compression index  $c_{c,ls}$  and loading stage frequency  $F_{ls}$ . 6 soils tested. (a)  $\omega_c = 0\%$ ; (b)  $\omega_c = 0\% (L)$ ; (c)  $\omega_c = 3\%$ ; (d)  $\omega_c = 6\%$ ; (e)  $\omega_c = 9\%$ ; (f)  $\omega_c = 12\%$

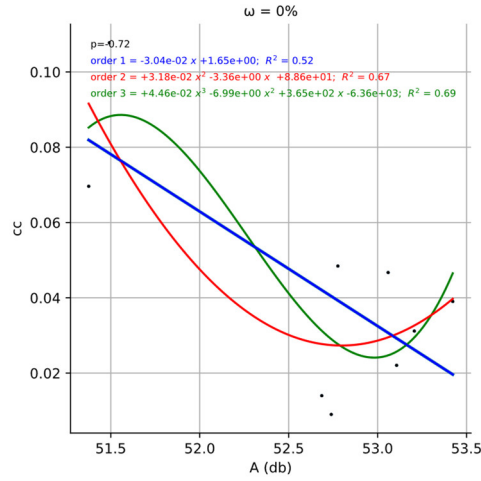

(a)

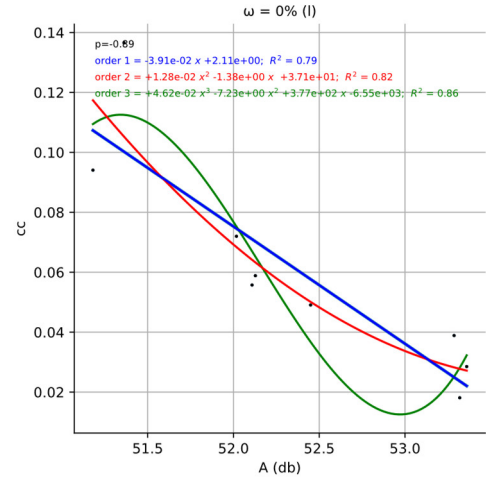

(b)

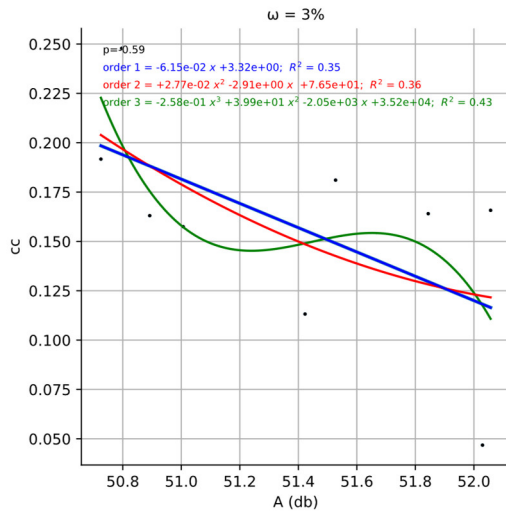

(c)

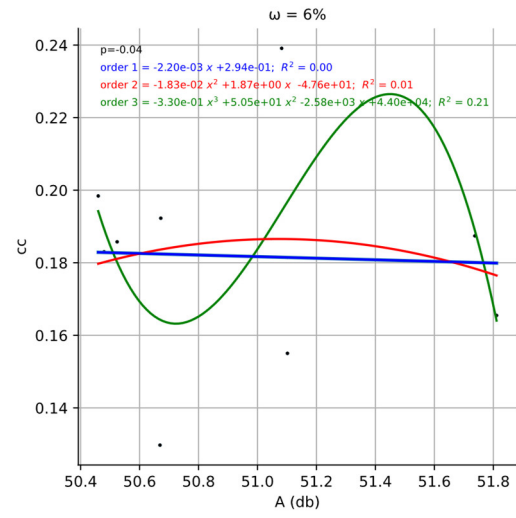

(d)

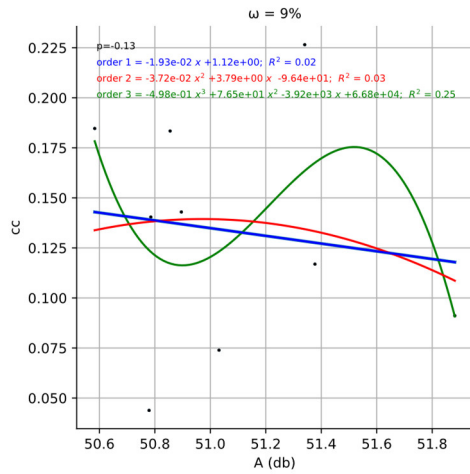

(e)

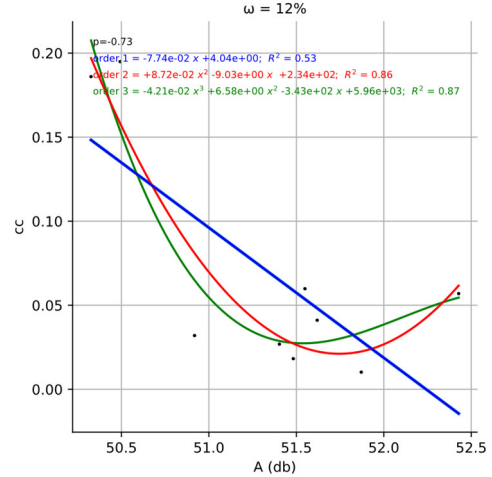

(f)

**Figure S12.** Regression lines for the correlation between loading stage compression index  $c_{c,ls}$  and loading stage amplitude  $A_{ls}$ . 6 soils tested. (a)  $\omega_c = 0\%$ ; (b)  $\omega_c = 0\% (L)$ ; (c)  $\omega_c = 3\%$ ; (d)  $\omega_c = 6\%$ ; (e)  $\omega_c = 9\%$ ; (f)  $\omega_c = 12\%$

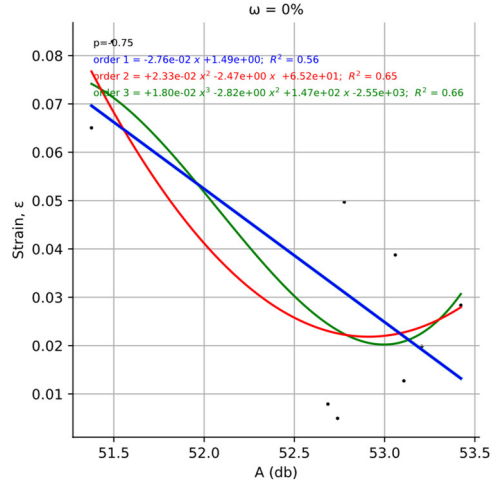

(a)

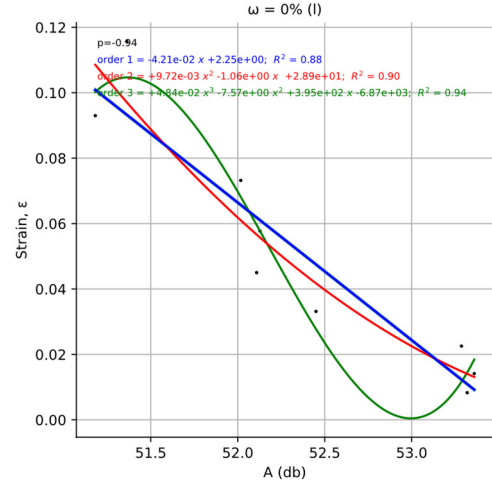

(b)

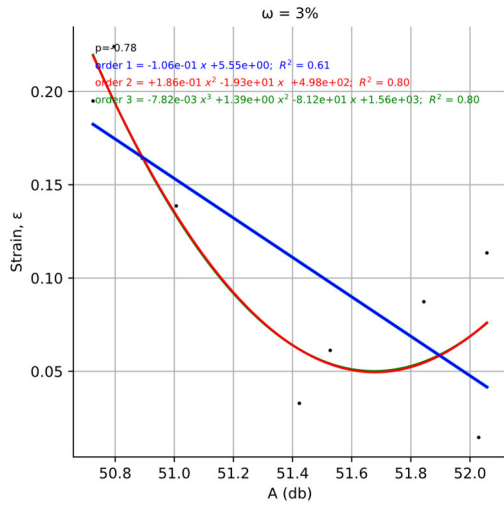

(c)

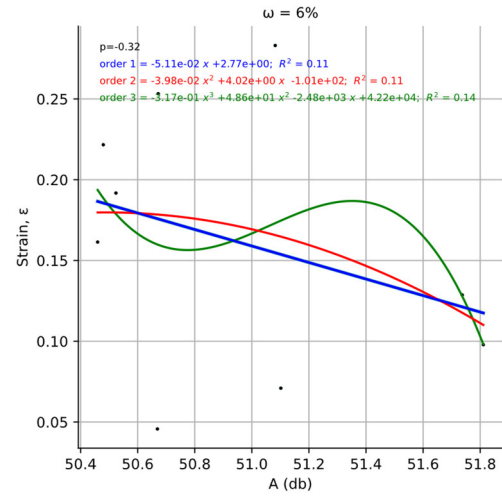

(d)

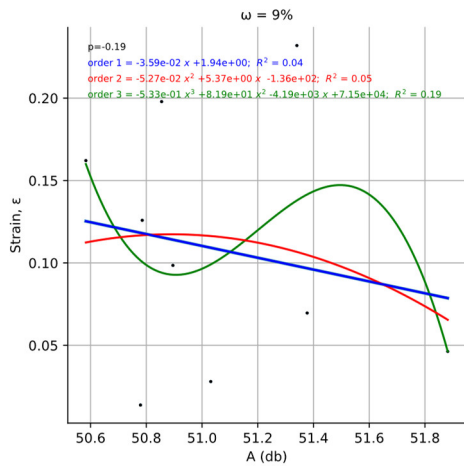

(e)

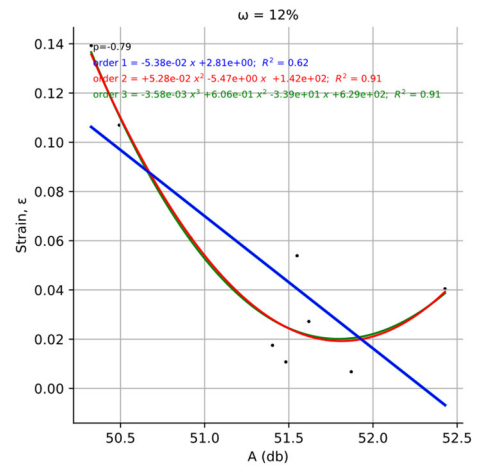

(f)

**Figure S13.** Regression lines for the correlation between loading stage strain  $\epsilon_{ls}$  and loading stage amplitude  $A_{ls}$ . 6 soils tested. (a)  $\omega_c = 0\%$ ; (b)  $\omega_c = 0\% (I)$ ; (c)  $\omega_c = 3\%$ ; (d)  $\omega_c = 6\%$ ; (e)  $\omega_c = 9\%$ ; (f)  $\omega_c = 12\%$

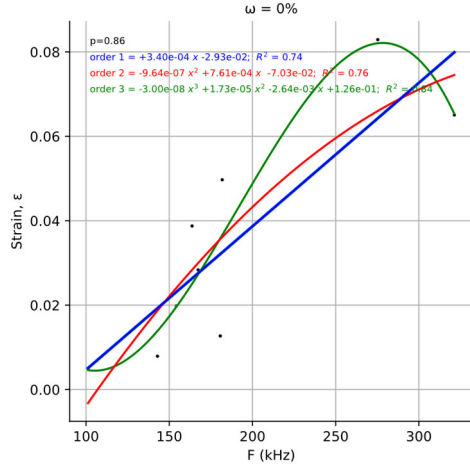

(a)

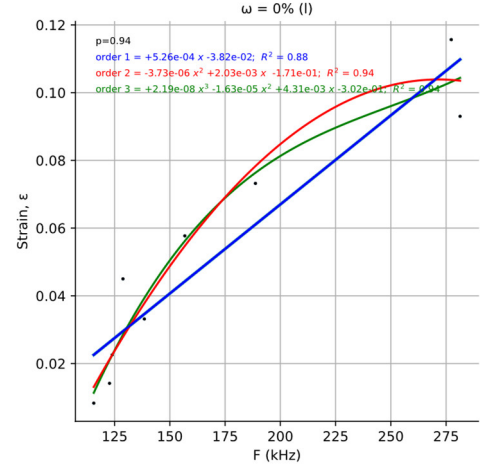

(b)

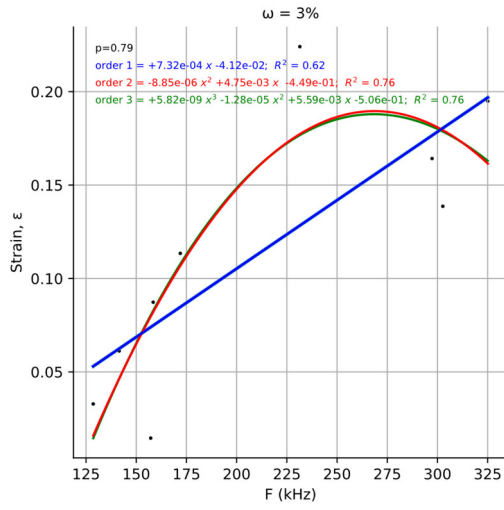

(c)

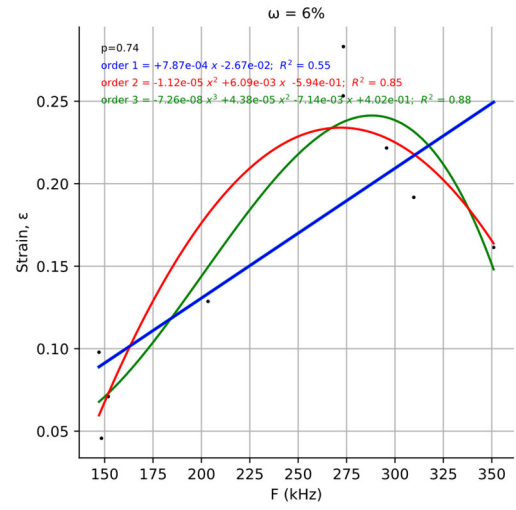

(d)

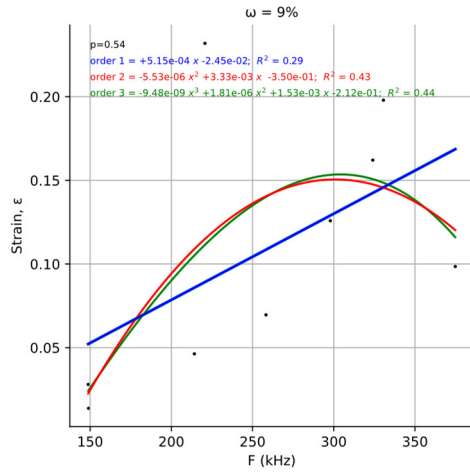

(e)

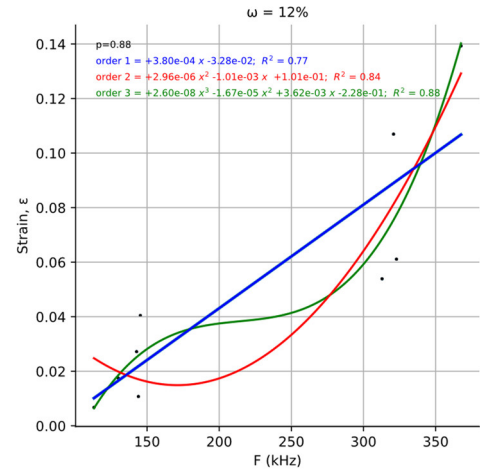

(f)

**Figure S14.** Regression lines for the correlation between loading stage strain  $\epsilon_{ls}$  and loading stage frequency  $F_{ls}$ . 6 soils tested. (a)  $\omega_c = 0\%$ ; (b)  $\omega_c = 0\% (I)$ ; (c)  $\omega_c = 3\%$ ; (d)  $\omega_c = 6\%$ ; (e)  $\omega_c = 9\%$ ; (f)  $\omega_c = 12\%$

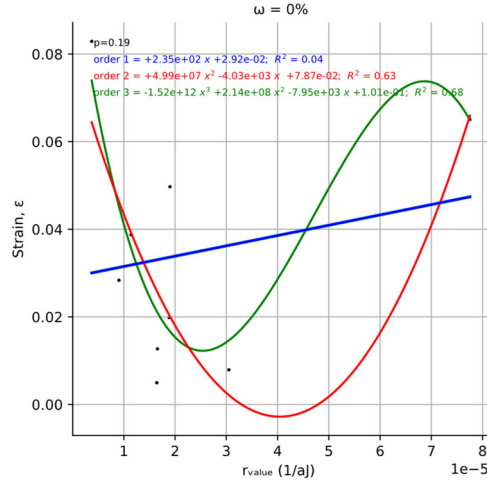

(a)

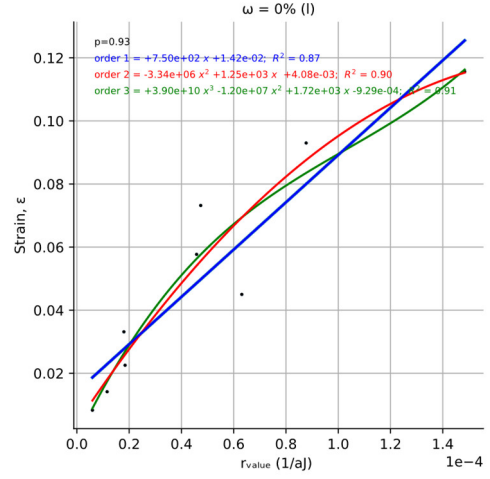

(b)

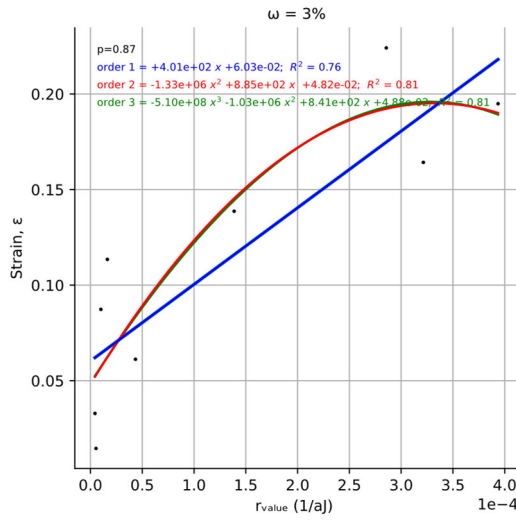

(c)

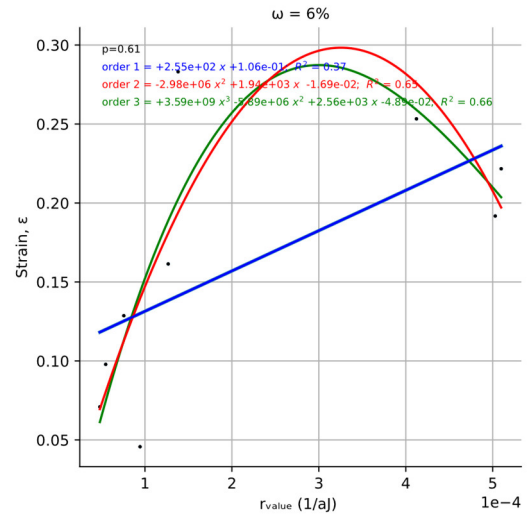

(d)

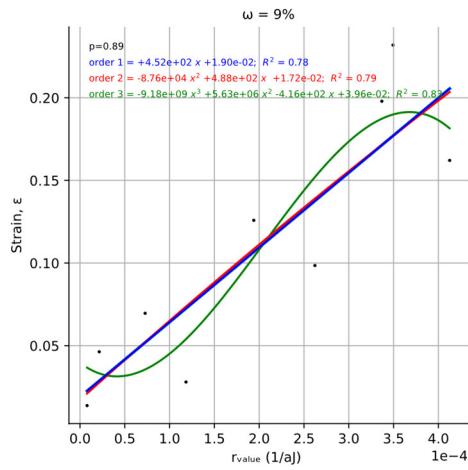

(e)

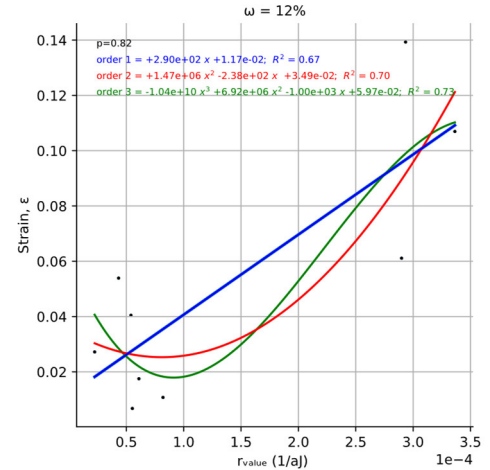

(f)

**Figure S15.** Regression lines for the correlation between loading stage strain  $\epsilon_{ls}$  and loading stage  $r$  value  $r_{ls}$ . 6 soils tested. (a)  $\omega_c = 0\%$ ; (b)  $\omega_c = 0\%$  (L); (c)  $\omega_c = 3\%$ ; (d)  $\omega_c = 6\%$ ; (e)  $\omega_c = 9\%$ ; (f)  $\omega_c = 12\%$

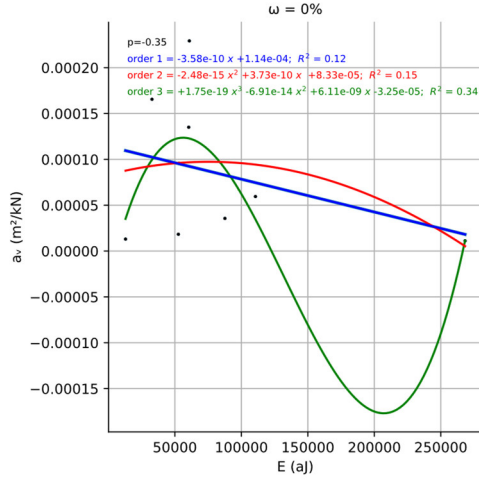

(a)

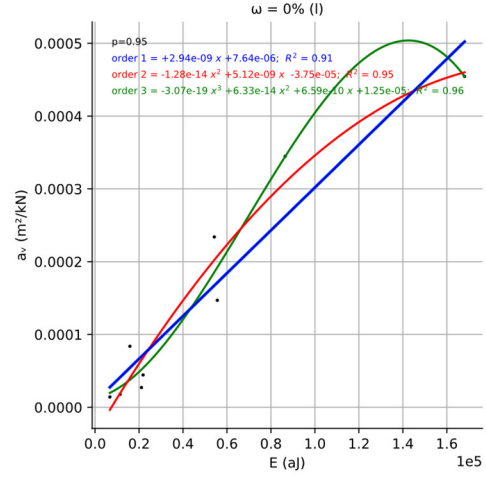

(b)

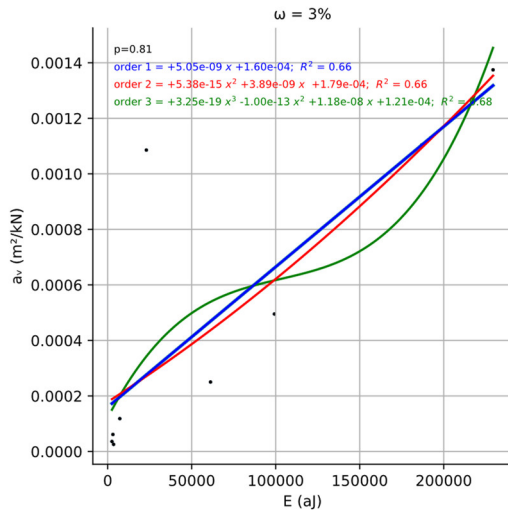

(c)

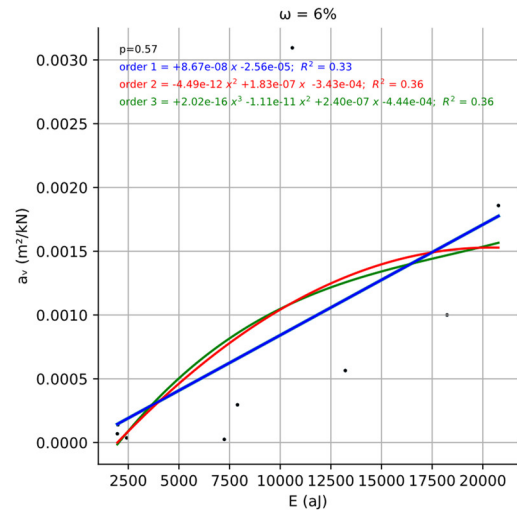

(d)

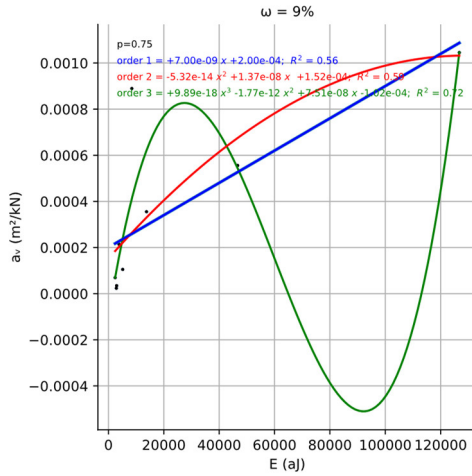

(e)

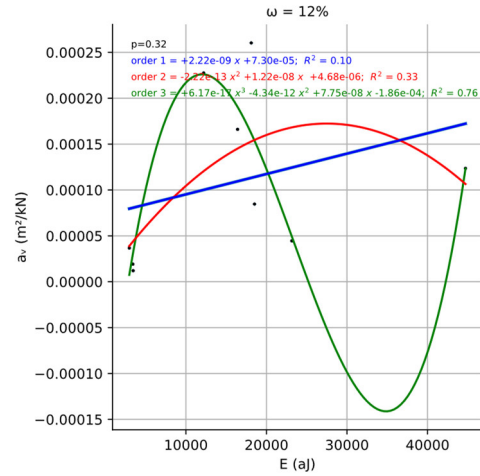

(f)

**Figure S16.** Regression lines for the correlation between loading stage coefficient of compressibility  $a_{v,ls}$  and loading stage energy  $E_{ls}$ . 6 soils tested. (a)  $\omega_c = 0\%$ ; (b)  $\omega_c = 0\% (L)$ ; (c)  $\omega_c = 3\%$ ; (d)  $\omega_c = 6\%$ ; (e)  $\omega_c = 9\%$ ; (f)  $\omega_c = 12\%$



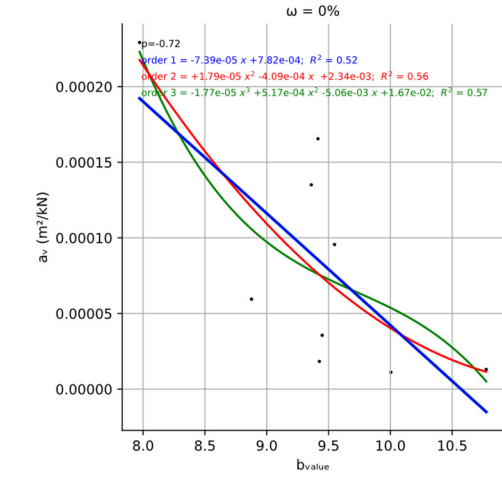

(a)

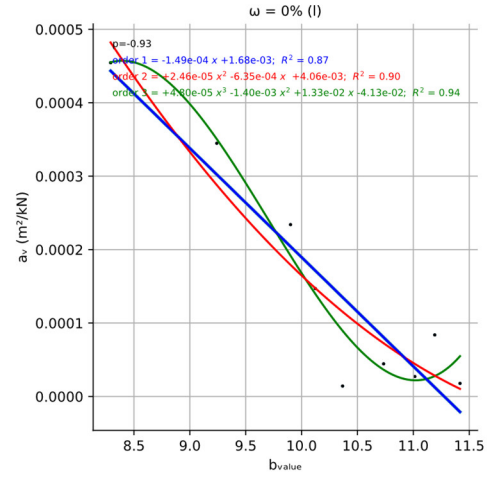

(b)

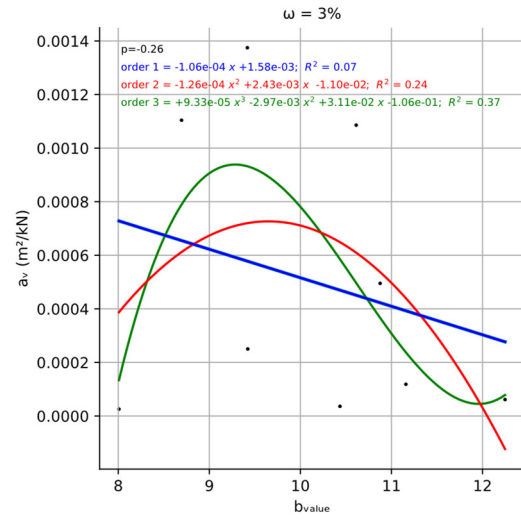

(c)

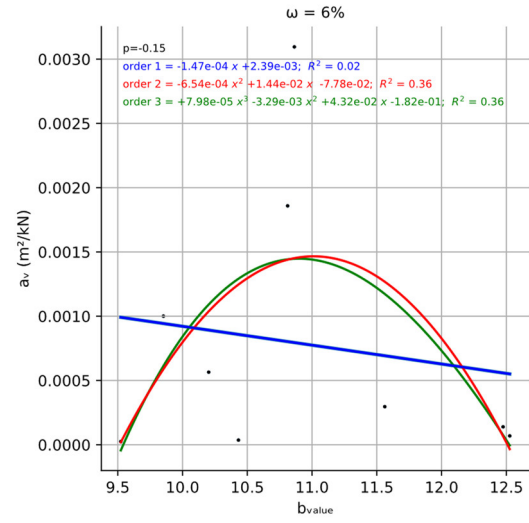

(d)

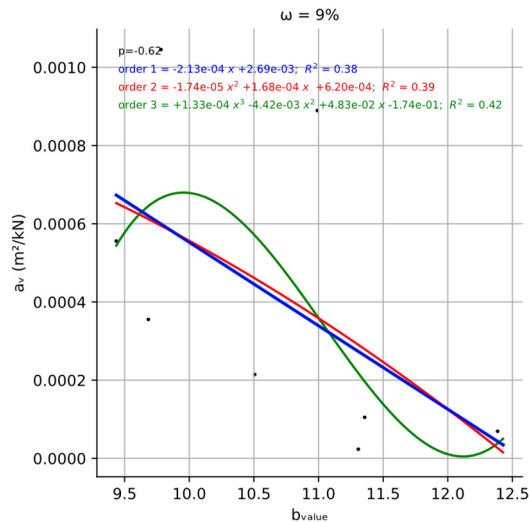

(e)

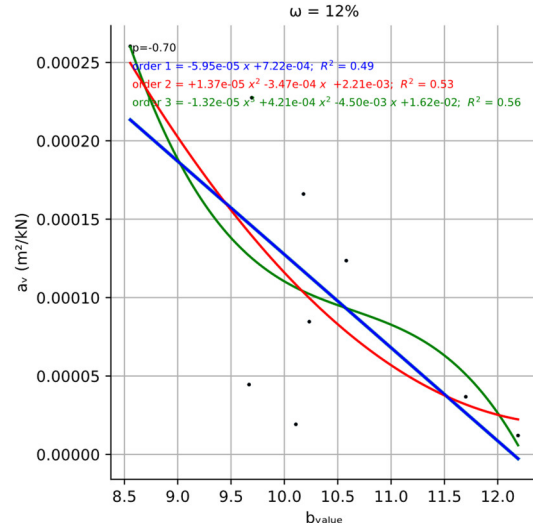

(f)

**Figure S17.** Regression lines for the correlation between loading stage coefficient  $a_{v,ls}$  and loading stage b value  $b_{ls}$ . 6 soils tested. (a)  $\omega_c = 0\%$ ; (b)  $\omega_c = 0\% (L)$ ; (c)  $\omega_c = 3\%$ ; (d)  $\omega_c = 6\%$ ; (e)  $\omega_c = 9\%$ ; (f)  $\omega_c = 12\%$

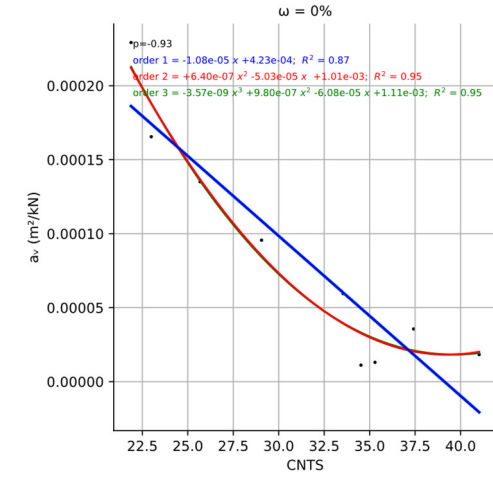

(a)

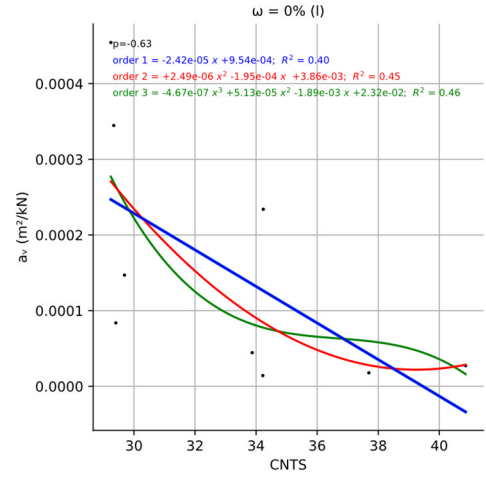

(b)

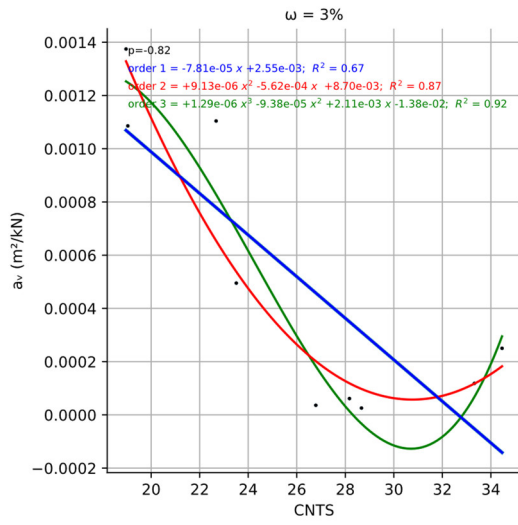

(c)

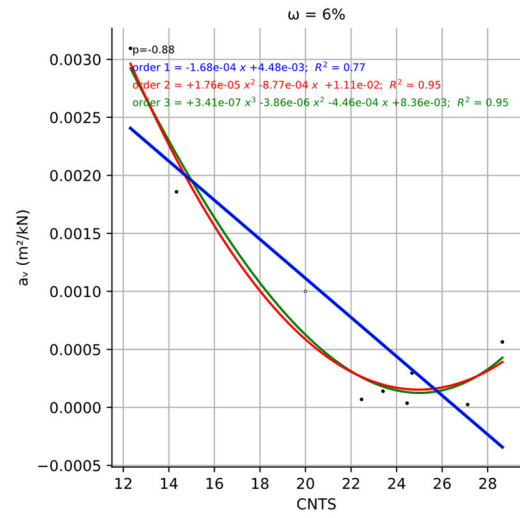

(d)

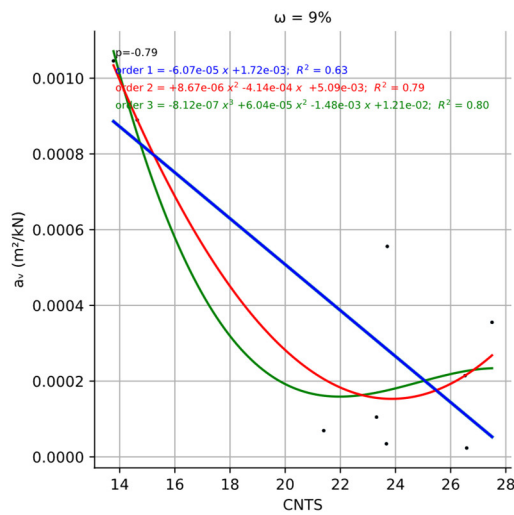

(e)

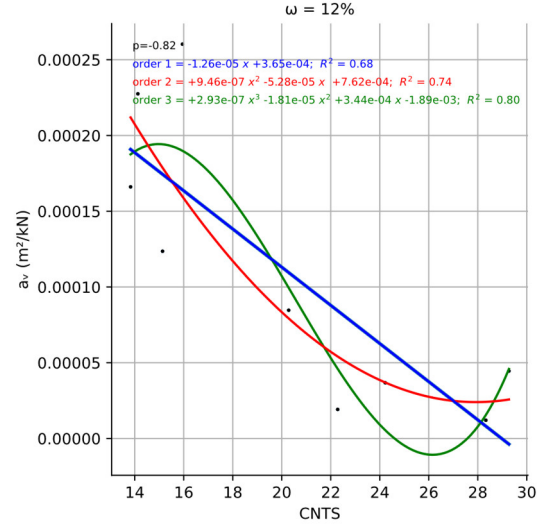

(f)

**Figure S18.** Regression lines for the correlation between loading stage coefficient of compressibility  $a_{v,ls}$  and loading stage counts number  $CNTS_{ls}$ , 6 soils tested. (a)  $\omega_c = 0\%$ ; (b)  $\omega_c = 0\% (L)$ ; (c)  $\omega_c = 3\%$ ; (d)  $\omega_c = 6\%$ ; (e)  $\omega_c = 9\%$ ; (f)  $\omega_c = 12\%$

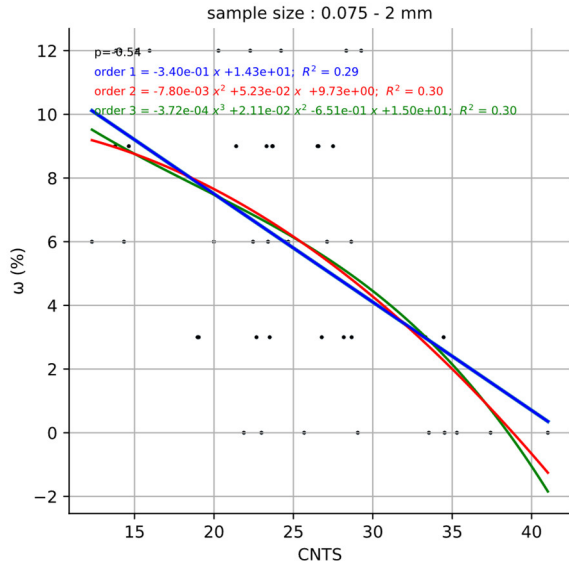

(a)

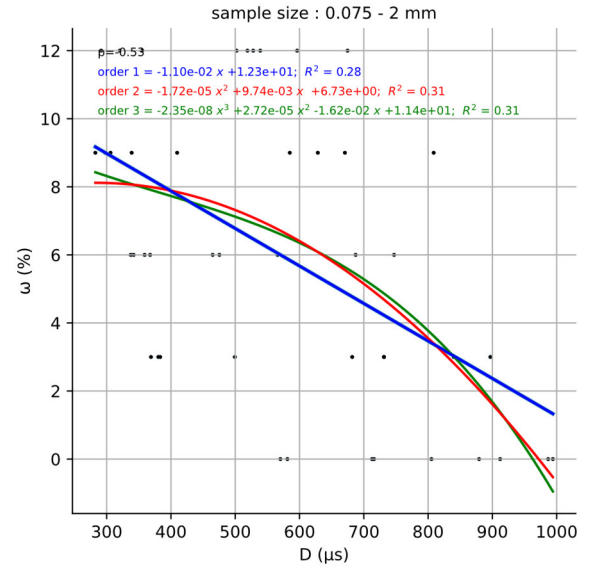

(b)

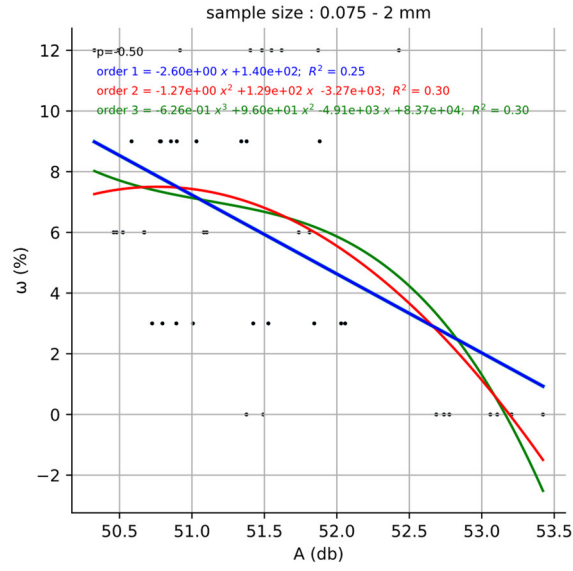

(c)

**Figure S19.** Regression lines for the best correlations between moisture content  $\omega_c$  and monitored acoustic variables (any value of moisture content). (a)  $CNTS_{IS}$ ; (b)  $D_{IS}$ ; (c)  $A_{IS}$ .

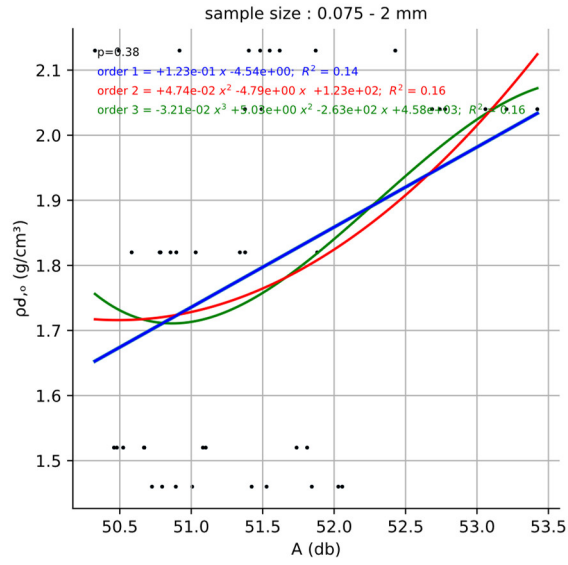

(a)

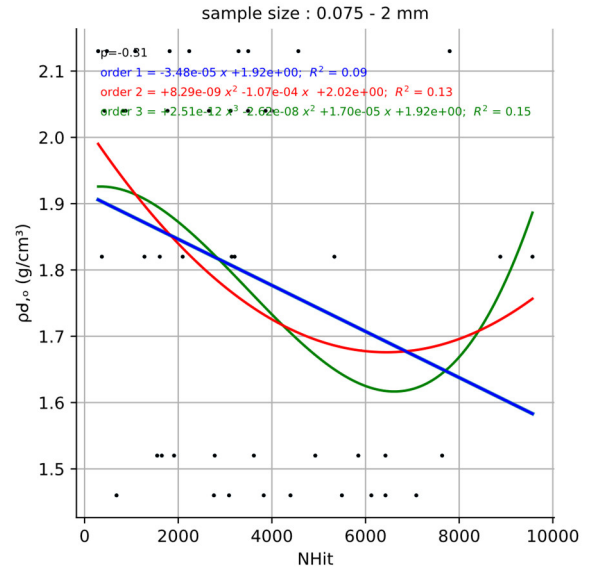

(b)

**Figure S20.** Regression lines for the best correlations between initial dry density  $\rho_{d,0}$  and monitored acoustic variables (any value of moisture content). (a)  $A_{I_{IS}}$  ; (b)  $NHit_{I_{IS}}$ .

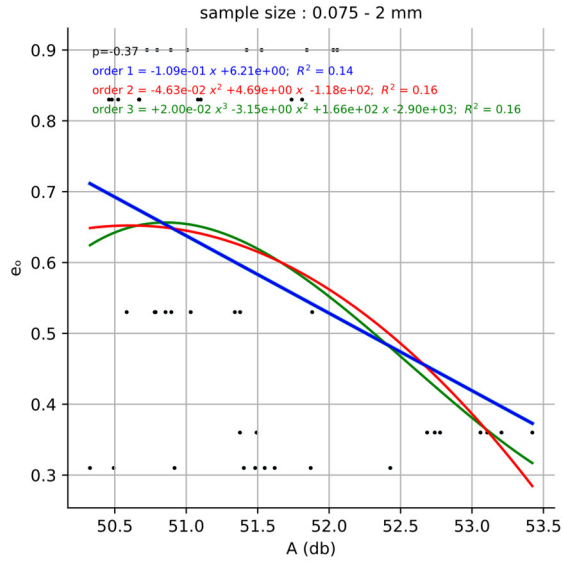

(a)

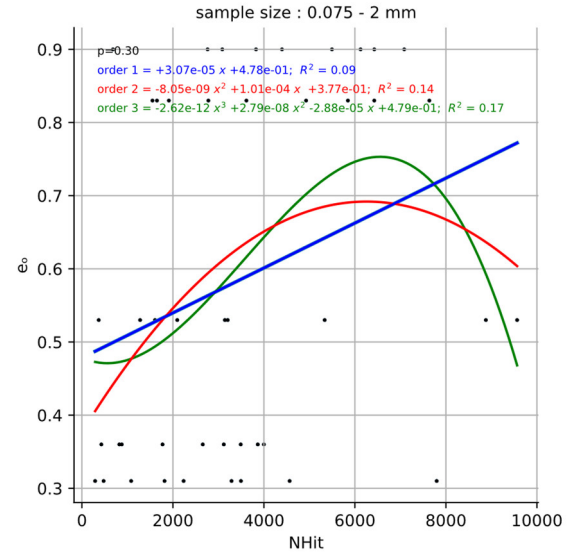

(b)

**Figure S21.** Regression lines for the best correlations between initial void ratio  $e_0$  and monitored acoustic variables (any value of moisture content). (a)  $A_{1s}$ ; (b)  $NHit_{1s}$ .

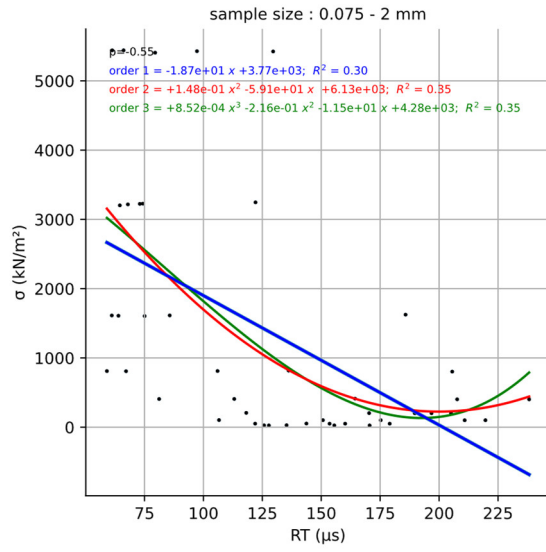

(a)

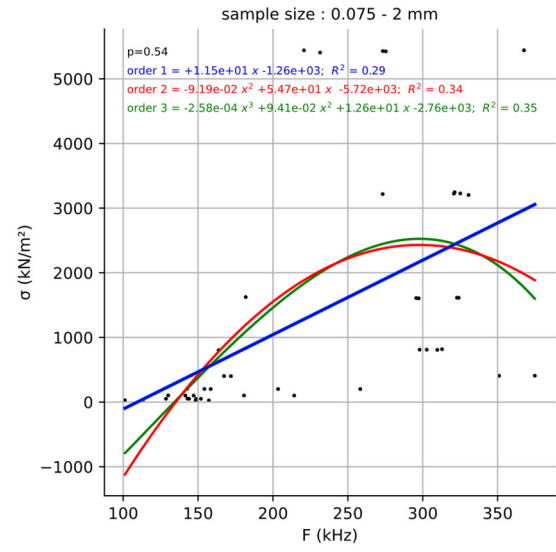

(b)

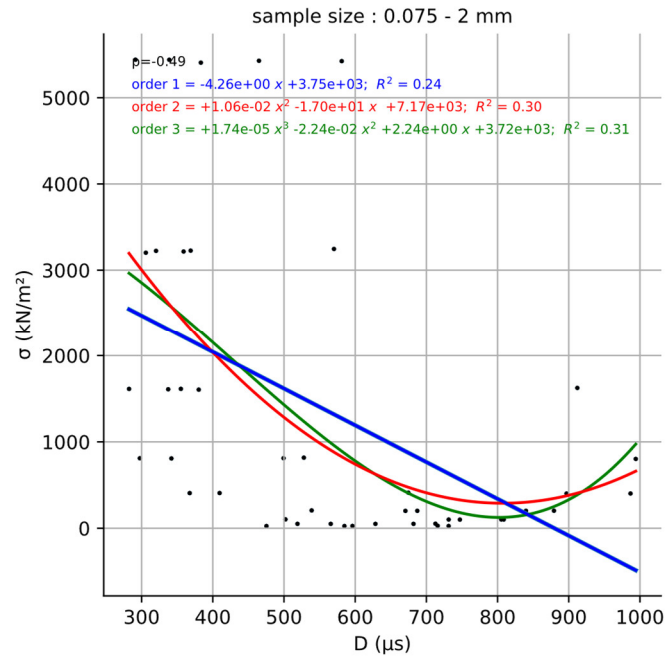

(c)

**Figure S22.** Regression lines for the best correlations between loading stage effective stress  $\sigma'_{ls}$  and monitored acoustic variables (any value of moisture content). (a)  $RT_{ls}$ ; (b)  $F_{ls}$ ; (c)  $D_{ls}$ .



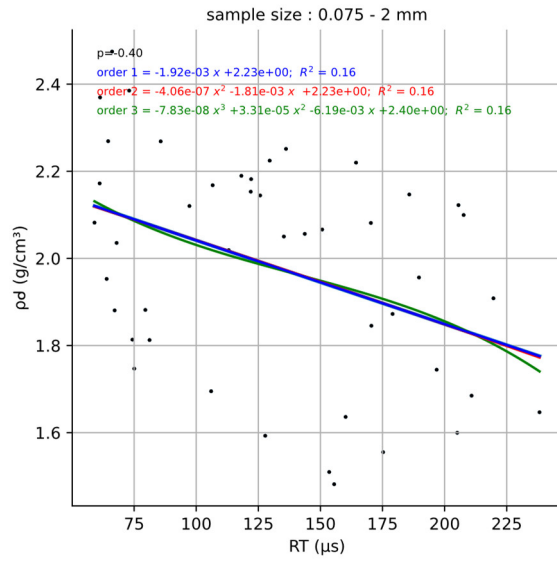

(a)

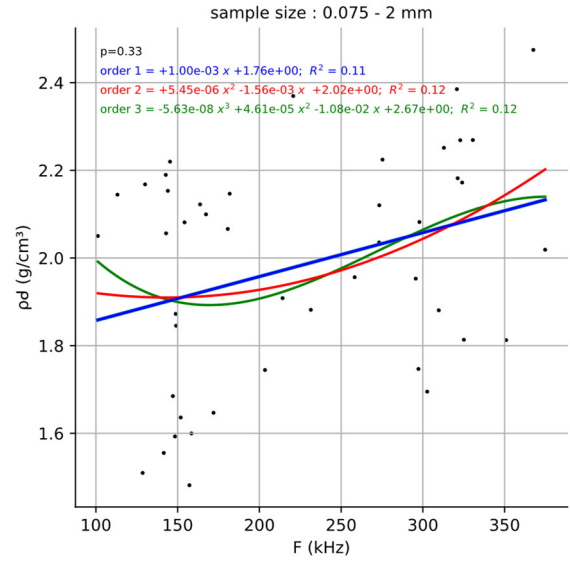

(b)

**Figure S23.** Regression lines for the best correlations between loading stage dry density  $\rho_{d,ls}$  and monitored acoustic variables (any value of moisture content). (a)  $RT_{ls}$ ; (b)  $F_{ls}$ .

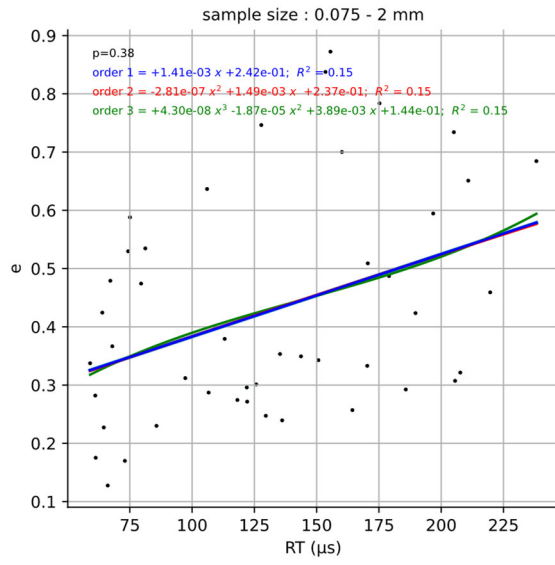

(a)

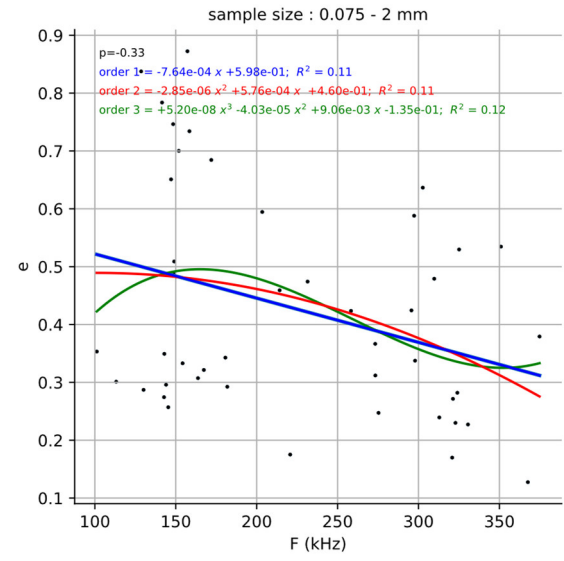

(b)

**Figure S24.** Regression lines for the best correlations between loading stage void ratio  $e_{ls}$  and monitored acoustic variables (any value of moisture content). (a)  $RT_{ls}$ ; (b)  $F_{ls}$ .

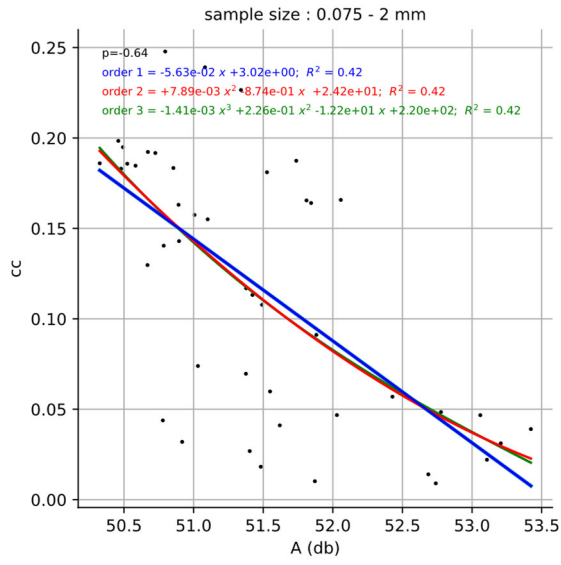

(a)

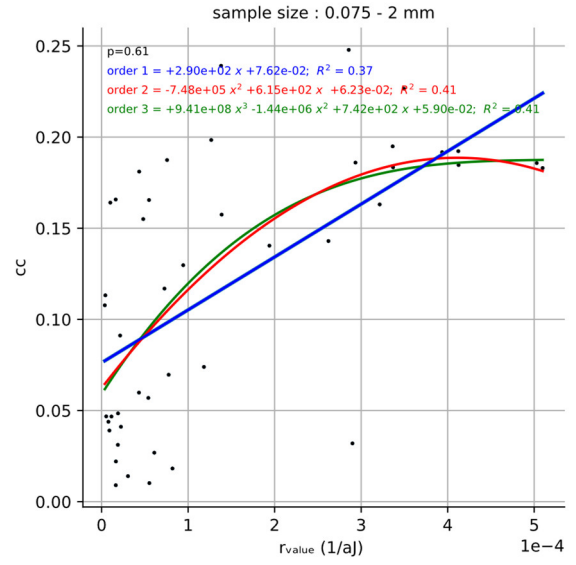

(b)

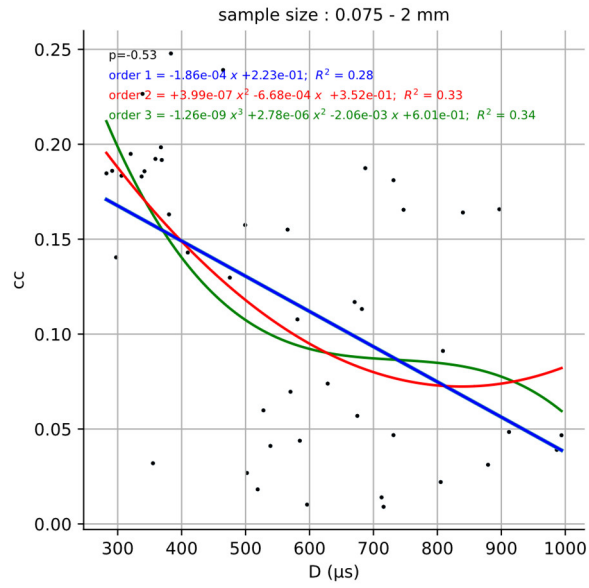

(c)

**Figure S25.** Regression lines for the best correlations between loading stage compression index  $c_{c,ls}$  and monitored acoustic variables (any value of moisture content). (a)  $A_{ls}$ ; (b)  $r_{ls}$ ; (c)  $D_{ls}$ .

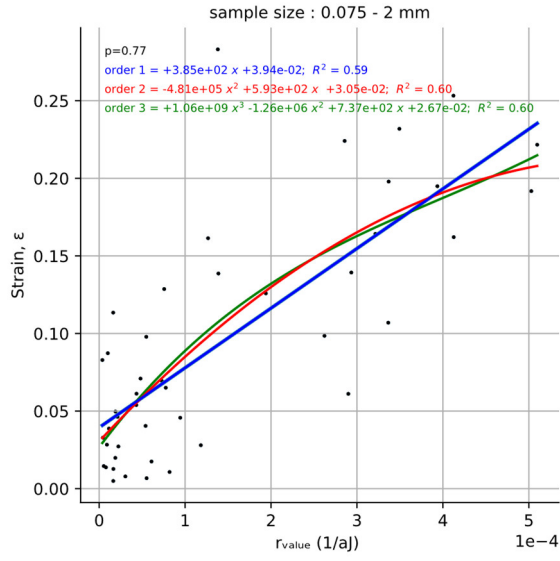

(a)

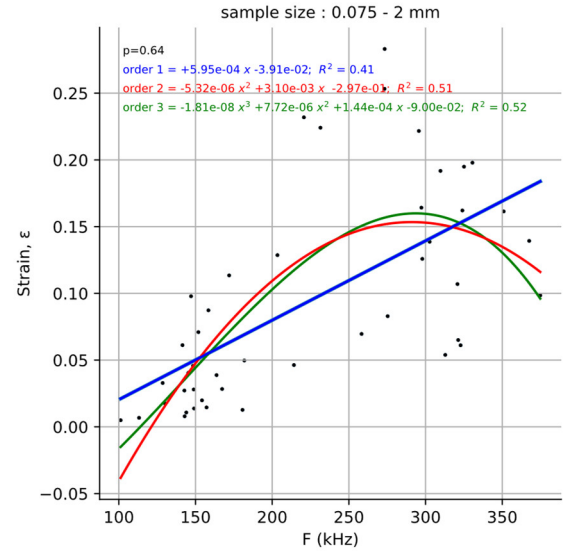

(b)

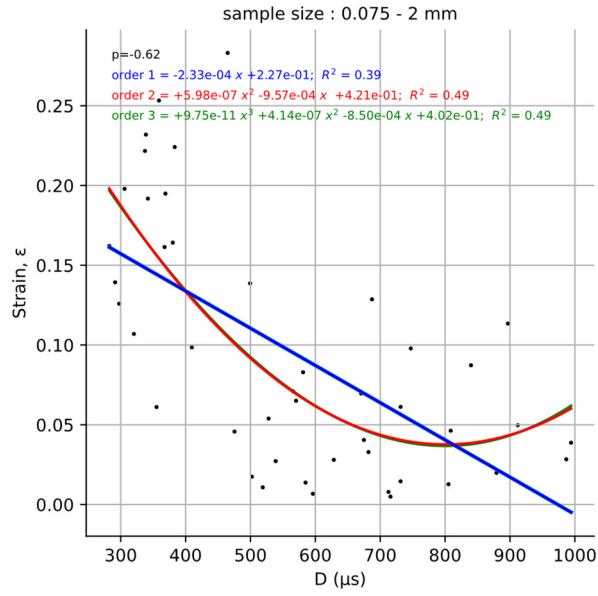

(c)

**Figure S26.** Regression lines for the best correlations between loading stage strain  $\epsilon_{ls}$  and monitored acoustic variables (any value of moisture content). (a)  $r_{ls}$ ; (b)  $F_{ls}$ ; (c)  $D_{ls}$ .

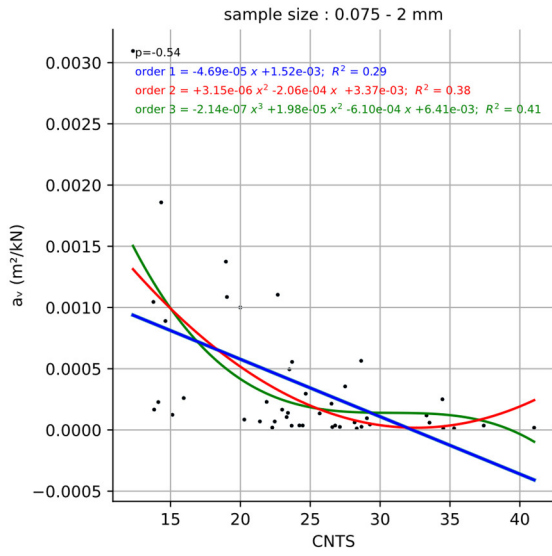

(a)

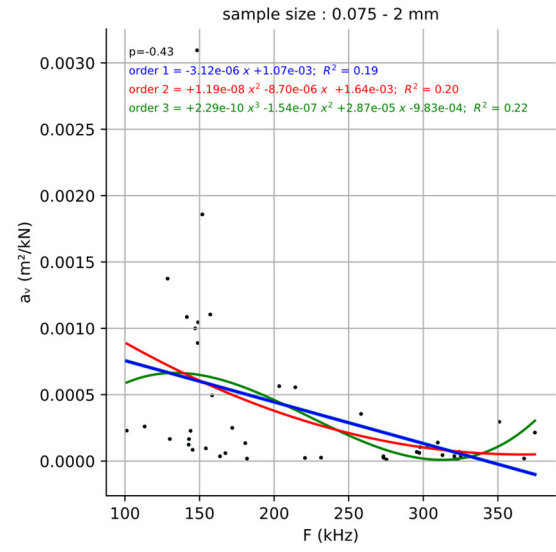

(b)

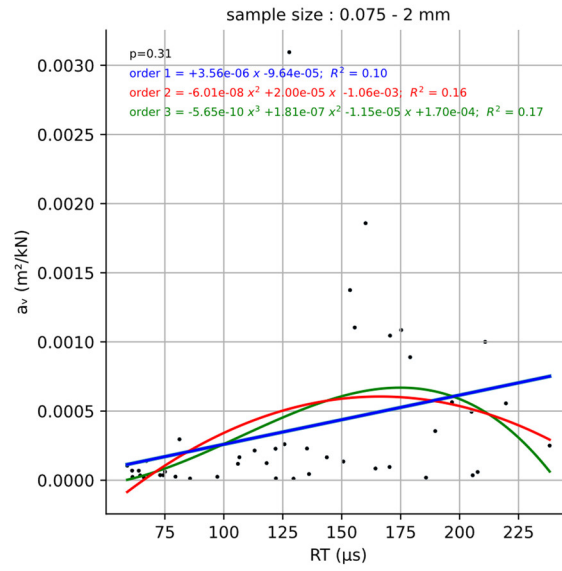

(c)

**Figure S27.** Regression lines for the best correlations between loading stage coefficient of compressibility  $a_{v,ls}$  and monitored acoustic variables (any value of moisture content). (a)  $CNTS_{ls}$ ; (b)  $F_{ls}$ ; (c)  $RT_{ls}$ .
